## 45 ABSTRACT

46  
47 Maternally synthesized products play critical roles in development of offspring. A premier  
48 example is the *C. elegans* H3K36 methyltransferase MES-4, which is essential for germline  
49 survival and development in offspring. How maternal MES-4 protects germline immortality is  
50 not well understood, but its role in H3K36 methylation hinted that it may regulate gene  
51 expression in Primordial Germ Cells (PGCs). We tested this hypothesis by profiling transcripts  
52 from single pairs of PGCs dissected from wild-type and *mes-4* mutant (lacking maternal and  
53 zygotic MES-4) newly hatched larvae. We found that *mes-4* PGCs display normal turn-on of  
54 most germline genes and normal repression of somatic genes, but dramatically up-regulate  
55 hundreds of genes on the X chromosome. We demonstrated that X mis-expression is the cause  
56 of germline death by generating and analyzing *mes-4* mutants that inherited different  
57 endowments of X chromosome(s). Intriguingly, removal of the THAP transcription factor LIN-  
58 15B from *mes-4* mutants reduced X mis-expression and prevented germline death. *lin-15B* is X-  
59 linked and mis-expressed in *mes-4* PGCs, identifying it as a critical target for MES-4 repression.  
60 The above findings extend to the H3K27 methyltransferase MES-2/3/6, the *C. elegans* version of  
61 Polycomb Repressive Complex 2. We propose that maternal MES-4 and PRC2 cooperate to  
62 protect germline survival by preventing synthesis of germline-toxic products encoded by genes  
63 on the X chromosome, including the key transcription factor LIN-15B.

## 64 65 INTRODUCTION

66  
67 Many critical events during early development are orchestrated by maternally synthesized gene  
68 products. Mutations in genes that encode such products in the mother can cause ‘maternal-  
69 effect’ phenotypes in offspring. These phenotypes are usually severe developmental defects.  
70 Maternal-effect lethal genes, which cause maternal-effect death of offspring, encode products  
71 that guide crucial events in early embryo development, such as pattern formation and  
72 embryonic genome activation (e.g. the PAR proteins in *C. elegans*, BICOID in *Drosophila*, and  
73 Mater in mouse) (Nusslein-Volhard et al. 1987; Tong et al., 2000; Kemphues et al. 1988).  
74 Maternal-effect sterile genes encode products needed for fertility of the offspring. A few genes  
75 in this category encode proteins in germ granules (e.g. PGL-1 in *C. elegans* and VASA in  
76 *Drosophila*) (Nusslein-Volhard et al. 1987; Rongo and Lehmann, 1996; Kawasaki et al., 1998).  
77 Another fascinating set of genes in this category encode chromatin regulators, which are the  
78 focus of this paper.

79  
80 The *C. elegans* MES proteins were identified in genetic screens for maternal-effect sterile  
81 mutants, hence their name (MES for Maternal-Effect Sterile) (Capowski et al., 1991). MES-2,  
82 MES-3, and MES-6 assemble into a trimeric complex that is the *C. elegans* version of Polycomb  
83 Repressive Complex 2 (PRC2) (Xu et al., 2001; Bender et al., 2004). PRC2 is a histone  
84 methyltransferase (HMT) that methylates Lys 27 on histone H3 (H3K27me) to repress genes  
85 that are packaged by those methylated nucleosomes (Ketel et al., 2005; Margueron and  
86 Reinberg, 2011; Pengelly et al., 2013). MES-4 is an HMT that methylates Lys 36 on H3  
87 (H3K36me), which marks actively transcribing genes and has context-dependent roles in  
88 transcriptional regulation (Bender et al., 2006; Furuhashi et al., 2010; Rechtsteiner et al., 2010,

89 Kreher et al., 2018). Although PRC2 and MES-4 catalyze opposing flavors of histone marking,  
90 the loss of either causes nearly identical mutant phenotypes (Capowski et al., 1991). Worms  
91 that inherit a maternal load of gene product but cannot synthesize zygotic product (referred to  
92 as *mes* M+Z- mutants) are fertile. Worms that do not inherit a maternal load or produce zygotic  
93 gene product (*mes* M-Z- mutants) are sterile due to death of nascent germ cells in early- to mid-  
94 stage larvae. In *mes* M-Z+ mutants, zygotically synthesized product does not rescue fertility,  
95 highlighting the critical importance of maternal product. PRC2's roles in transcriptional  
96 repression and development have been intensively studied and are well defined across species,  
97 including roles in *C. elegans* germline development (Bender et al., 2004, Patel et al., 2012;  
98 Gaydos et al., 2014; Kaneshiro et al., 2019; Delaney et al., 2019). In contrast, how MES-4  
99 ensures the survival of nascent germ cells is unknown and particularly puzzling.

100  
101 One possibility for MES-4 function is that maternal MES-4 promotes expression in offspring of  
102 genes required for germline development. Support for this comes from analyses of mutants  
103 that ectopically express germline genes in their soma (e.g. *mep-1*, *lin-15B*, *lin-35*, and *spr-5*;  
104 *met-2* mutants), and as a result, have developmental defects (Unhavaithaya et al., 2002; Wang  
105 et al., 2005; Cui et al., 2006; Petrella et al., 2011; Wu et al., 2012; Carpenter et al., 2021).  
106 Concomitant loss of MES-4 from these mutants prevents ectopic expression of germline genes  
107 and restores worm health (Wang et al., 2005; Cui et al., 2006; Petrella et al., 2011; Wu et al.,  
108 2012; Carpenter et al., 2021). In wild-type early embryos, MES-4 and methylated H3K36  
109 associate with genes that were transcribed in the maternal germline, regardless of whether  
110 they are transcribed in embryos (Furuhashi et al., 2010; Rechtsteiner et al., 2010). Focusing on  
111 H3K36me3, genetic tests showed that MES-4 strictly maintains pre-existing patterns of  
112 H3K36me3 and is unable to catalyze *de novo* H3K36me3 marking of genes (Furuhashi et al.,  
113 2010); the other H3K36 HMT in *C. elegans*, MET-1, like H3K36 HMTs in other systems, catalyzes  
114 *de novo* H3K36me3 on genes in response to transcriptional turn-on (Kizer et al., 2005;  
115 Furuhashi et al., 2010; Kreher et al., 2018). Taken together, these findings suggested the  
116 appealing model that in embryos maternal MES-4 maintains H3K36me3 marking of germline-  
117 expressed genes and in that way transmits an epigenetic 'memory of germline', a  
118 developmental blueprint, to the primordial germ cells (PGCs) of offspring.

119  
120 Two findings challenge the model that MES-4 somehow promotes expression of germline  
121 genes. First, among *mes-4* M-Z- mutants, hermaphrodites (with 2 X chromosomes) are always  
122 sterile, while males (with 1 X chromosome) can be fertile (Garvin et al., 1998). This suggested  
123 that the dosage of X-linked genes matters for the *Mes-4* mutant phenotype. Second, profiling  
124 transcripts in the gonads of fertile *mes-4* M+Z- mutant hermaphrodites revealed that the most  
125 dramatic effect of losing zygotic MES-4 is up-regulation of genes on the X (Bender et al., 2006;  
126 Gaydos et al., 2012). Notably, the X chromosomes are normally kept globally repressed during  
127 all stages of germline development in males and during most stages of germline development  
128 in hermaphrodites (Kelly et al., 2002; Reinke et al., 2004; Wang et al., 2009, Arico et al., 2011;  
129 Strome et al., 2014; Tzur et al., 2018), and likely as a consequence, most germline-expressed  
130 genes are located on the autosomes. These findings focused attention on the X chromosome  
131 and raised the question – what role does maternal MES-4 serve to ensure that PGCs survive and  
132 develop into a full and healthy germline?

133  
134 To investigate the role of MES-4 in PGCs, the cells that critically rely on maternal MES-4 for  
135 survival, and to formally test the model that MES-4 promotes expression of germline genes, we  
136 performed transcript profiling in dissected single pairs of PGCs from wild-type versus *mes-4* M-  
137 Z- mutant larvae. We asked if absence of maternal MES-4 causes PGCs to 1) fail to turn on  
138 germline genes, 2) inappropriately turn on somatic genes, and/or 3) inappropriately turn on X-  
139 linked genes. We found that in *mes-4* PGCs most germline genes were turned on normally, thus  
140 disproving the model that the major role of MES-4 is to promote expression of germline genes  
141 in PGCs. Most somatic genes were kept off, arguing that MES-4 does not protect the germline  
142 by opposing somatic development. The most dramatic impact to the transcriptome in *mes-4*  
143 PGCs was up-regulation of hundreds of X-linked genes, many of which are part of an oogenesis  
144 program. Our genetic analysis of *mes-4* mutants with different X-chromosome endowments  
145 from the oocyte and sperm demonstrated that up-regulation of X-linked genes is the cause of  
146 death of nascent germ cells in *mes-4* M-Z- mutant larvae. We identified the transcription factor  
147 LIN-15B, an X-linked gene up-regulated in *mes-4* mutants, as a major cause of X mis-expression  
148 and germline death in *mes-4* mutants. Performing similar tests of PRC2 (*mes-3*) M-Z- mutant  
149 larvae revealed that their PGCs up-regulate many X-linked genes in common with *mes-4* PGCs,  
150 and that removal of LIN-15B restores the health of their germline, as it does for *mes-4* mutants.  
151 This study revealed that maternal MES-4 and PRC2 cooperate to ensure germline survival and  
152 health in offspring by preventing mis-expression of genes on the X chromosome, and that both  
153 operate through a key X-encoded transcription factor.

## 154 155 **RESULTS**

### 156 157 **MES-4 is not required for PGCs to launch a germline program**

158  
159 MES-4 propagates an epigenetic ‘memory’ of a germline gene expression program during  
160 embryogenesis by maintaining H3K36me3 on genes that were previously transcribed in  
161 parental germlines (Rechtsteiner et al., 2010, Furuhasi et al., 2010; Kreher et al., 2018). A  
162 popular model predicts that delivery of this memory to offspring PGCs instructs them to launch  
163 a gene expression program that promotes germline proliferation and development. To test this  
164 model, we performed RNA-sequencing to determine whether PGCs from *mes-4* M-Z- (Maternal  
165 MES-4 minus and Zygotic MES-4 minus) mutant larvae, which completely lack MES-4, fail to  
166 turn on a germline program (Figure 1A). We developed a hand-dissection strategy that enables  
167 us to isolate in <30 minutes single sets of 2 sister PGCs, marked by a specifically and highly  
168 expressed germline marker (GLH-1::GFP), from wild-type or *mes-4* M-Z- mutant larvae for RNA-  
169 seq library preparation. We performed differential expression analysis to identify genes that are  
170 significantly down-regulated (DOWN) or up-regulated (UP) in *mes-4* mutant PGCs compared to  
171 wild-type (wt) PGCs. Our analysis identified 176 DOWN genes and 450 UP genes (Figure 1B-D,  
172 Figure 2—figure supplement 2A,B).

173 To determine whether the DOWN genes include germline genes that fail to turn on  
174 normally in *mes-4* PGCs, we analyzed transcript levels and fold changes (*mes-4* vs. wt) for genes  
175 that are members of 2 ‘germline’ gene sets: 1) a ‘germline-specific’ set containing 168 genes  
176 that are expressed in germline tissue but not in somatic tissues, and 2) a ‘germline-enriched’ set

177 containing 2176 genes that are expressed at higher levels in adults with a germline compared to  
178 adults that lack a germline (see Methods for gene sets). We found that most germline-specific  
179 genes (162 of 168 genes or 96%) and germline-enriched genes (2111 of 2176 genes or 97%) are  
180 not significantly DOWN in *mes-4* PGCs (Figure 1B). The numbers of germline-specific genes and  
181 germline-enriched genes that are DOWN are not more than expected by chance (Figure 1E).

182 Since some gene expression defects may not manifest until after *mes-4* PGCs have  
183 started dividing, we used our hand-dissection strategy to isolate sets of 2 PGC descendants,  
184 which we call Early Germ Cells (EGCs), from wt and *mes-4* mutant L2 larvae and profiled their  
185 transcripts. We found that *mes-4* EGCs down-regulate more germline-specific and more  
186 germline-enriched genes than *mes-4* PGCs. However, like *mes-4* PGCs, *mes-4* EGCs turn on most  
187 germline genes normally (Figure 1—figure supplement 1).

188 As an independent test of differential expression in PGCs, we selected 3 genes and  
189 performed smFISH to measure and compare their transcript levels between *mes-4* and wt PGCs.  
190 2 of the genes we tested, *cpg-2* and *pgl-3*, are members of our germline-specific set and by  
191 RNA-seq analysis were DOWN or not DOWN respectively, in *mes-4* PGCs (Figure 2A-C, Figure  
192 2—figure supplement 1). Corroborating our RNA-seq analysis, smFISH analysis showed that the  
193 average transcript abundance of *cpg-2* is significantly lower in *mes-4* vs wt PGCs, while the  
194 average transcript abundance of *pgl-3* is not significantly different (Figure 2A-C). The other gene  
195 we tested by smFISH, *chs-1*, is a member of our germline-enriched set and was consistently not  
196 mis-expressed by RNA-seq or smFISH analysis (Figure 2C, Figure 2—figure supplement 1).  
197 Together, our RNA-seq and smFISH analysis showed that *mes-4* PGCs turn on most germline  
198 genes normally.

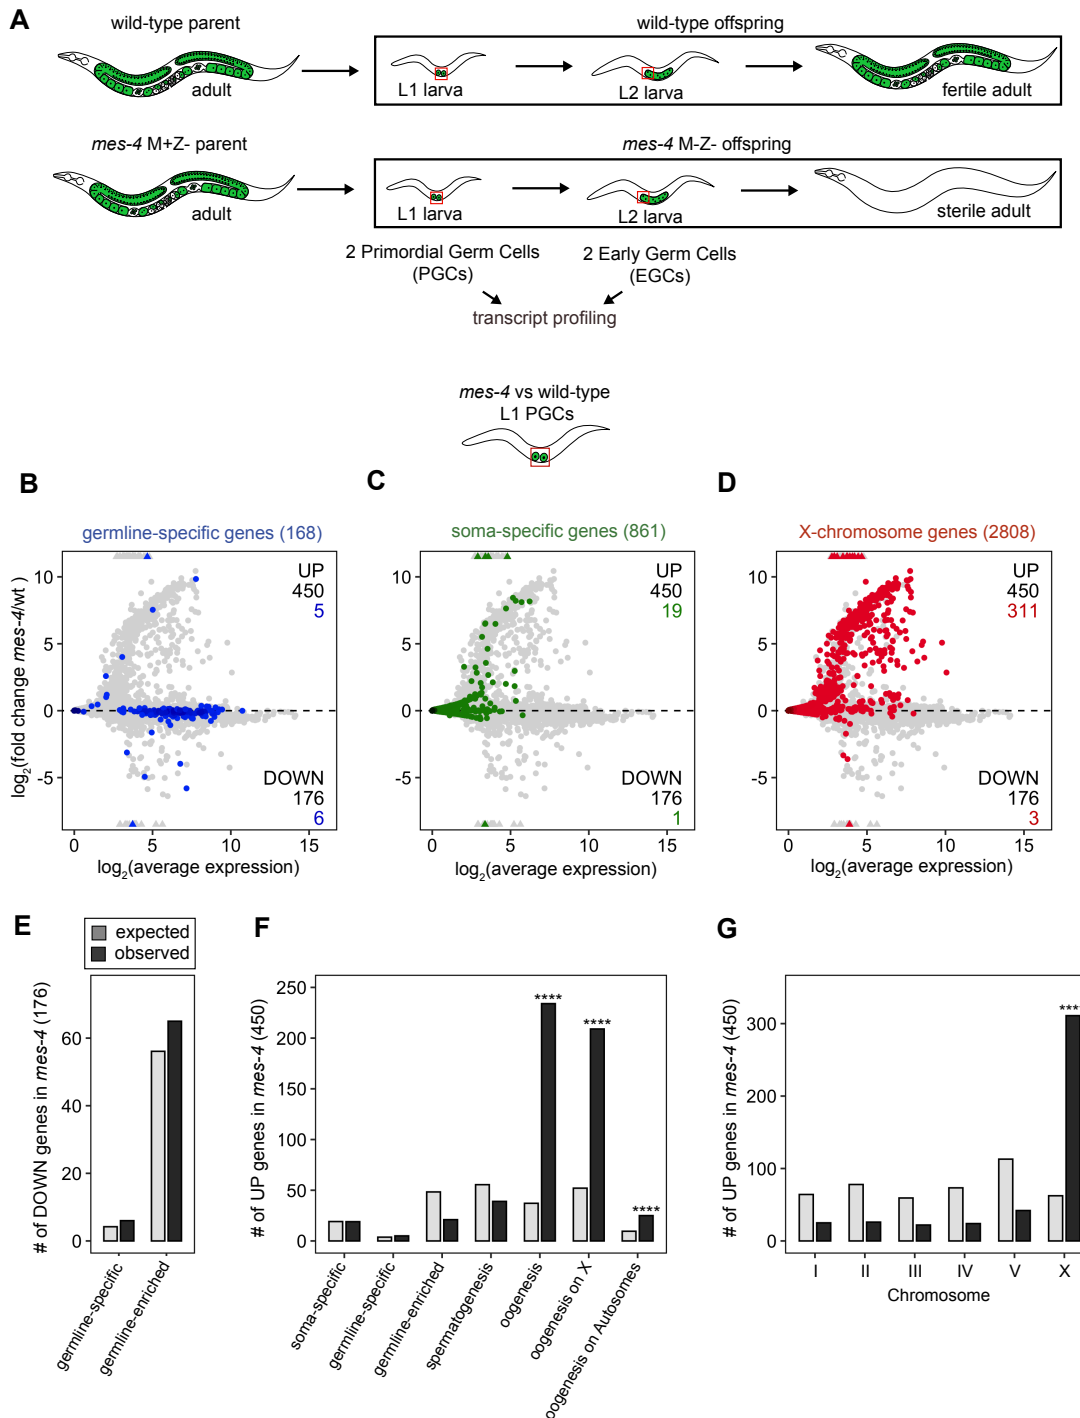

199 **Figure 1: Transcriptome analysis of *mes-4* M-Z- mutant PGCs.** (A) Cartoon illustrating the  
 200 Maternal-effect sterile (Mes) phenotype in *mes-4* mutants. *mes-4* M+Z- (M for Maternal, Z for  
 201 Zygotic) mutants cannot synthesize MES-4 (Z-) but are fertile because they inherited maternal  
 202 MES-4 gene product (M+). Removal of maternal MES-4 renders *mes-4* M-Z- mutant adults  
 203 sterile. Germline is green, and soma is white. Transcripts were profiled from single sets of 2  
 204 sister Primordial Germ Cells (PGCs) and from single sets of 2 Early Germ Cells (EGCs) (red boxes)  
 205 hand-dissected from *mes-4* M-Z- (hereafter called *mes-4*) mutant and wild-type (wt) L1 and L2  
 206 larvae, respectively. (B,C,D) MA plots showing  $\log_2(\text{average expression})$  versus  $\log_2(\text{fold change})$

207 of transcript abundance for 20,258 protein-coding genes (circles) between *mes-4* and wt PGCs.  
208 Genes that exceed one or both plot scales (triangles) are set at the maximum value of the scale.  
209 Genes belonging to a specific gene set are colored: (B) 168 germline-specific genes are blue, (C)  
210 861 soma-specific genes are green, and (D) 2808 X-chromosome genes are red. Differentially  
211 expressed genes in *mes-4* vs wt PGCs were identified using Wald tests in DESeq2 (Love et al.,  
212 2014) and by setting a q-value < 0.05 significance threshold. Numbers of all mis-regulated genes  
213 (black) and numbers of those in gene sets (colored) are indicated in the corners; top is  
214 upregulated (UP) and bottom is downregulated (DOWN) in *mes-4* vs wt. (E,F,G) Bar plots  
215 showing the expected number (light gray) and observed number (dark gray) of mis-regulated  
216 genes that are members of the indicated gene sets. Hypergeometric tests were performed in R  
217 to test for gene-set enrichment. P-value designations are \*\*\*\* < 1e-5. (E) Enrichment analyses  
218 for DOWN genes were restricted to 5,858 protein-coding genes that we defined as 'expressed'  
219 (minimum average read count of 1) in wt PGCs. Gene set sizes: germline-specific (140),  
220 germline-enriched (1867). (F,G) Enrichment analyses for UP genes included all 20,258 protein-  
221 coding genes in the transcriptome. Gene set sizes: soma-specific (861), germline-specific (168),  
222 germline-enriched (2176), spermatogenesis-enriched (2498), oogenesis (1671), oogenesis on X  
223 (470), oogenesis on Autosomes (1201), chrI (2888), chrII (3508), chrIII (2670), chrIV (3300), chr  
224 V (5084), chr X (2808).

225

226 Figure 1—figure supplement 1: *mes-4* M-Z- EGCs have more severe transcriptome defects than  
227 *mes-4* M-Z- PGCs.

228 Figure 1—figure supplement 2: Analysis of features of mis-regulated genes in *mes-4* M-Z- PGCs  
229 and EGCs.

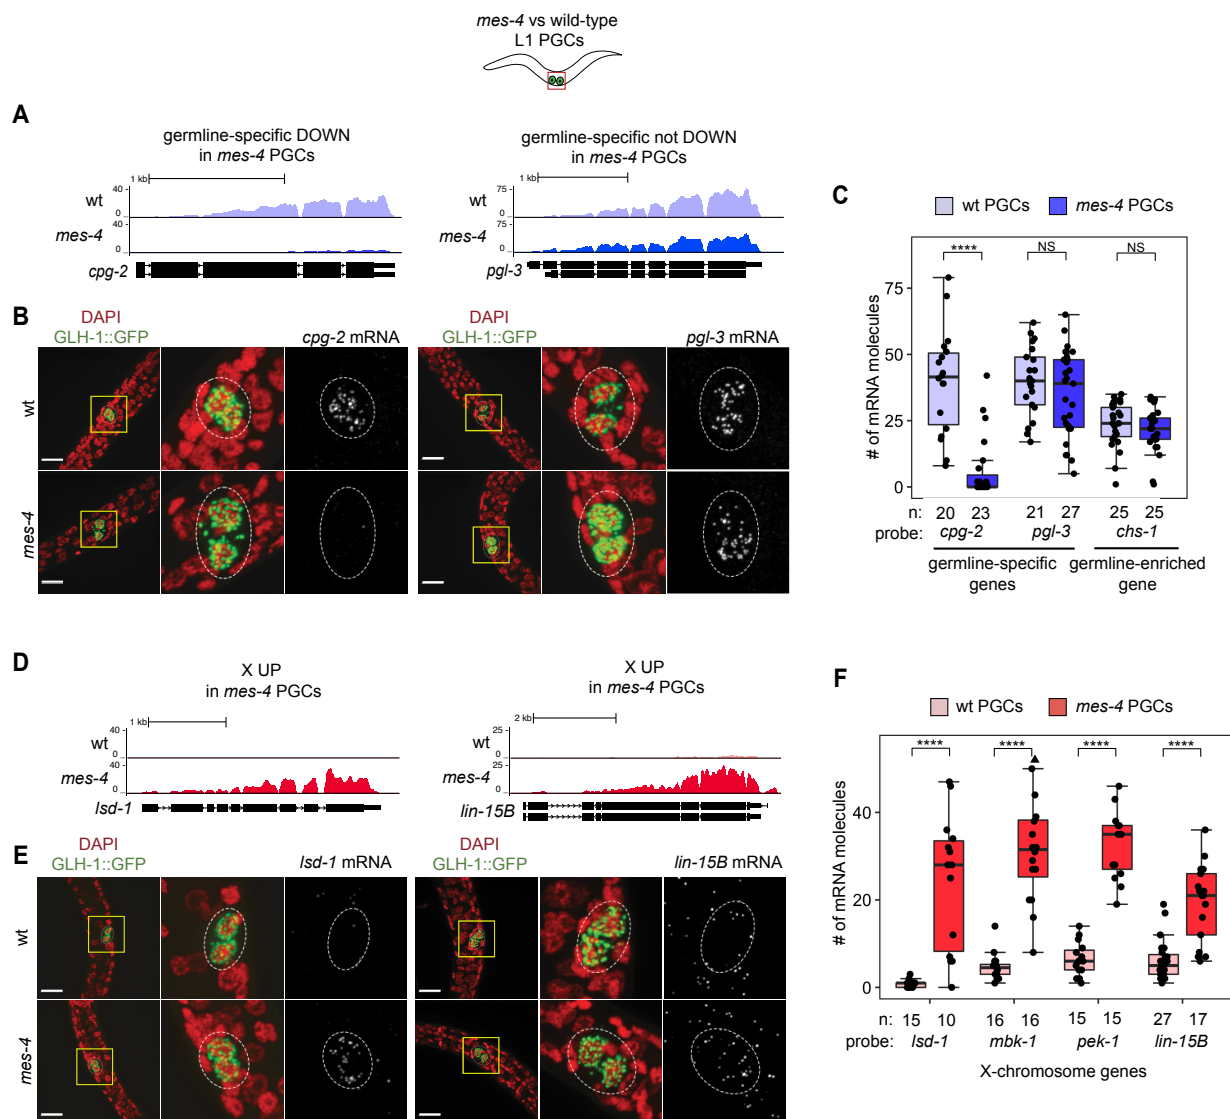

230  
 231 **Figure 2: Transcript quantification in *mes-4* M-Z mutant PGCs by single-molecule FISH**  
 232 **(smFISH) corroborates RNA-seq results.** (A,D) UCSC genome browser images showing average  
 233 sequencing read coverage over Ensembl gene models for wild-type (wt) PGCs (top track) and  
 234 *mes-4* PGCs (bottom track). (A) 2 germline-specific genes: *cpg-2* (left) and *pgl-3* (right). *cpg-2* is  
 235 DOWN and *pgl-3* is not DOWN in transcript profiling of *mes-4* vs wt PGCs. (D) 2 X-linked UP  
 236 genes in transcript profiling of *mes-4* vs wt PGCs and/or EGCs: *lsd-1* (left) and *lin-15B* (right).  
 237 (B,E) Representative maximum-intensity Z-projection images of smFISH experiments in L1  
 238 larvae. DAPI-stained nuclei are red. GLH-1::GFP is green. The dashed lines circumscribe PGCs  
 239 marked by GLH-1::GFP. The 2<sup>nd</sup> and 3<sup>rd</sup> images in each set are zoomed insets of the yellow box  
 240 in the 1<sup>st</sup> image. Foci in the mRNA channel (3<sup>rd</sup> image in each set) represent individual  
 241 transcripts. Scale bars are 10 microns. (B) smFISH RNA probes targeting *cpg-2* (left) and *pgl-3*  
 242 (right) transcripts. (E) smFISH RNA probes targeting *lsd-1* (left) and *lin-15B* (right) transcripts.  
 243 (C,F) Transcript quantification in smFISH 3D images of PGCs. Each circle represents 1 quantified  
 244 image. The number of quantified images for each combination of probe and genotype is  
 245 indicated. Boxplots show the median, the 25<sup>th</sup> and 50<sup>th</sup> percentiles (boxes), and the 2.5<sup>th</sup> and



246 97.5<sup>th</sup> percentiles (whiskers). Mann-Whitney tests were used to compare a gene's transcript  
247 counts between *mes-4* and wt PGCs. P-value designations are NS > .01, \*\*\*\* < 1e-5. (C)  
248 Quantification of *cpq-2*, *pgl-3*, and *chs-1* transcripts. *chs-1* is in the germline-enriched gene set  
249 and is not DOWN in transcript profiling of *mes-4* vs wt PGCs. (F) Quantification of *lsd-1*, *mbk-1*,  
250 *pek-1*, and *lin-15B* transcripts, 4 X-linked UP genes in transcript profiling of *mes-4* vs wt PGCs  
251 and/or EGCs.

252

253 Figure 2—figure supplement 1: Comparison of smFISH and transcript profiling data.

254

255

256

257

258

259

260

261

262

263

264

265

266

267

268

269

270

271

272

273

274

275

276

277

278

279

280

281

282

283

284

285

286

287

288

289

## 290 **MES-4 is not required to keep somatic genes off in PGCs**

291  
292 Chromatin regulators can protect tissue-appropriate transcription patterns by serving as a  
293 barrier to promiscuous transcription factor activity. Loss of MES-4 and PRC2 have both been  
294 shown to allow mis-expression of neuronal target genes upon ectopic expression of the  
295 transcription factor CHE-1 in the germline (Patel et al., 2012; Seelk et al., 2016). Moreover, loss  
296 of PRC2 activity in the *C. elegans* germline was recently linked to mis-expression of some  
297 neuronal genes and conversion to neuronal fate (Kaneshiro et al., 2019). Maternal MES-4 may  
298 promote offspring germline development by preventing germ cells from turning on a somatic  
299 gene expression program. To test this possibility, we examined whether UP genes in *mes-4* vs  
300 wt PGCs are members of a 'soma-specific' gene set that defines 861 genes expressed in soma  
301 but not in germline. We found that only 19 UP genes are soma-specific, which is not a higher  
302 number than expected by chance (Figure 1C,F). Therefore, *mes-4* PGCs do not mis-express a  
303 soma-specific program.

## 305 **MES-4 represses genes on the X chromosome including many oogenesis genes in PGCs**

306  
307 Repression of the X chromosomes in the *C. elegans* germline is essential for germline health  
308 (reviewed in Strome et al., 2014). We found that 311 of the 2808 (11%) protein-coding X genes  
309 are UP in *mes-4* vs wt PGCs. Strikingly, more than half of all UP genes are on the X chromosome  
310 (311 out of 450 genes), and this number is significantly higher than expected by chance (Figure  
311 1F). We found that *mes-4* EGCs mis-express 564 X genes, including almost all of the X genes that  
312 are mis-expressed in *mes-4* PGCs and an additional 273 X genes (Figure 1—figure supplement  
313 1C,F). These data show that *mes-4* PGCs mis-express many genes on the X chromosome and  
314 that X mis-expression becomes more severe in their descendant EGCs.

315 As an independent test of differential expression, we selected 4 X-linked UP genes and  
316 performed smFISH to compare their transcript levels between *mes-4* vs wt PGCs (Figure 2—  
317 figure supplement 1). smFISH analysis showed that all 4 X genes have higher transcript  
318 abundance in *mes-4* PGCs than in wt PGCs (Figure 2D-F), corroborating our transcriptome  
319 analysis. These data reveal that the X chromosome is the primary focus of MES-4 regulation in  
320 PGCs.

321 While most X-linked genes are repressed during germline proliferation and  
322 spermatogenesis, some are normally turned-on during oogenesis (Kelly et al., 2002; Arico et al.,  
323 2011; Tzur et al., 2018, Figure 1—figure supplement 2E). We examined whether X-linked UP  
324 genes are those that are normally turned-on during oogenesis by comparing our set of X-linked  
325 UP genes to a set of 'oogenesis' genes, defined as 470 X-linked and 1201 autosomal genes that  
326 are expressed at higher levels in dissected adult oogenic germlines than in dissected  
327 spermatogenic germlines (Ortiz et al., 2014). We found that 209 of the 311 (67%) X-linked UP  
328 genes and 25 of the 149 (17%) autosomal UP genes are in the oogenesis set, which are both  
329 higher numbers than expected by chance (Figure 1F). The enrichment for oogenesis X-linked  
330 genes was especially high. No other germline gene set that we tested (germline-specific,  
331 germline-enriched, and spermatogenesis) was enriched in the set of UP genes in *mes-4* PGCs  
332 (Figure 1F). Based on gene ontology (GO) analysis, the set of X-linked UP genes in *mes-4* PGCs  
333 and/or EGCs is enriched for biological process terms that characterize roles in oogenesis:

334 ‘reproduction’ and ‘embryo development ending in birth or hatching’. (Figure 1—figure  
335 supplement 2F-H). We conclude that *mes-4* PGCs mis-express an oogenesis program involving  
336 many X-linked genes, which may interfere with the ability of mutant PGCs to proliferate.

337

### 338 **Mis-expression of genes on the X chromosome(s) causes germline death in *mes-4* mutants**

339

340 Since X mis-expression is the largest defect to the transcriptome in *mes-4* PGCs, we  
341 hypothesized that mis-expression of the 2 X chromosomes in germlines of *mes-4* mutant  
342 hermaphrodites causes germline death. To test our hypothesis, we asked whether *mes-4*  
343 mutant males, which inherit only a single X chromosome (typically from the oocyte), have  
344 healthy germlines. We live imaged wild-type and *mes-4* mutant M-Z-hermaphrodites and males  
345 that express a germline-specific GFP reporter (GLH-1::GFP) and scored their germline health  
346 qualitatively as either ‘absent/tiny’ germline, ‘partial’ germline, or ‘full’ germline. All live-  
347 imaged *mes-4* mutant hermaphrodites lacked a germline (Figure 3A). In contrast, some *mes-4*  
348 mutant males that inherited their single X from an oocyte ( $X^{oo}$  males) had either partial or full  
349 germlines (21% and 4%, respectively). Since X chromosomes turn on during oogenesis (Kelly et  
350 al., 2002; Arico et al., 2011; Tzur et al., 2018, Figure 1—figure supplement 2E),  $X^{oo}$  males  
351 inherited an X with a history of expression. Using a *him-8* mutant, we generated wild-type and  
352 *mes-4* mutant males that instead inherited their X from a sperm ( $X^{sp}$  males), which has a history  
353 of repression because the X was not turned on previously during spermatogenesis. We tested  
354 whether *him-8; mes-4* mutant  $X^{sp}$  males that inherited a single X with a history of repression  
355 have healthier germlines than *mes-4* mutant  $X^{oo}$  males that inherited a single X with a history of  
356 expression. Strikingly, 67% *him-8; mes-4* mutant  $X^{sp}$  males made full germlines, compared to  
357 only 4% of *mes-4* mutant  $X^{oo}$  males.

358 A new and powerful genetic tool uses *gpr-1* over-expression to generate hermaphrodite  
359 worms that form a germline entirely composed of 2 genomes inherited from the sperm, or  
360 rarely 2 genomes inherited from the oocyte (Besseling and Bringmann, 2016; Artiles et al.,  
361 2019). Using this tool, we tested whether *mes-4* mutant hermaphrodites whose germline  
362 inherited from a sperm 2 X chromosomes with a history of repression (which we called  $X^{sp}/X^{sp}$   
363 hermaphrodites) have healthier germlines than *mes-4* mutant hermaphrodites whose germline  
364 inherited from an oocyte 2 X chromosomes with a history of expression (called  $X^{oo}/X^{oo}$   
365 hermaphrodites). While all *mes-4* mutant  $X^{oo}/X^{oo}$  hermaphrodites lacked a germline, some *mes-4*  
366 mutant  $X^{sp}/X^{sp}$  hermaphrodites had partial or full germlines (32% and 18%, respectively)  
367 (Figure 3A). Our combined genetic analysis demonstrates that mis-expression of the X  
368 chromosome(s) causes germline death in *mes-4* mutants. It also underscores that *mes-4* mutant  
369 PGCs can launch a normal germline program.

370

### 371 **MES-4 promotes germline health independently from its role in transmitting H3K36me3** 372 **patterns across generations**

373

374 Transmission of epigenetic information across generations can impact the health of offspring.  
375 We hypothesized that maternally loaded MES-4’s role in transmitting H3K36me3 patterns from  
376 parents to offspring is essential for offspring germline development. If so, then transmission of  
377 parental chromosomes lacking H3K36me3 to offspring should cause their germline to die even

378 if they received maternal MES-4. To test our hypothesis, we used the *gpr-1* genetic tool and the  
379 GLH-1::GFP germline marker to generate F1 adult offspring whose PGCs inherited 2  
380 H3K36me3(-) genomes from the sperm and either did or did not inherit maternal MES-4.  
381 Importantly, the germline in both types of F1 offspring had the same genotype (*met-1; mes-4*);  
382 the only difference between the F1s was the presence or absence of maternally loaded MES-4.  
383 We found that over half (57%) of F1 adult offspring had a full germline if their PGCs inherited 2  
384 H3K36me3(-) genomes and maternal MES-4 (Figure 3B). In contrast, 0% of F1 adult offspring  
385 had a full germline if their PGCs inherited 2 H3K36me3(-) genomes from the sperm and did not  
386 inherit maternal MES-4 (Figure 3B). This result shows that maternally loaded MES-4 is critical  
387 for offspring germline development but that its critical role is not to transmit H3K36me3  
388 patterns from parents to offspring.

389        Presence of maternal MES-4 allows many F1 offspring whose PGCs inherited 2  
390 H3K36me3(-) genomes from the sperm to make a full germline. One possibility is that  
391 maternally loaded H3K36 HMTs can re-establish sufficient levels of H3K36me3 marking to  
392 H3K36me3(-) chromosomes in PGCs for germline development. Since MES-4 cannot catalyze de  
393 novo H3K36me3 marking on H3K36me3(-) chromosomes (Furuhashi et al., 2010; Kreher et al.,  
394 2018), re-establishment of H3K36me3 levels would require the other H3K36 HMT MET-1, which  
395 can catalyze de novo marking in response to transcriptional turn-on, like H3K36 HMTs in other  
396 species. We found that removal of maternal MET-1, like removal of maternal MES-4, caused  
397 almost all F1 offspring whose PGCs inherited 2 H3K36me3(-) genomes from sperm to lack a  
398 germline. These findings show that maternal loads of both H3K36 HMTs are required for F1  
399 offspring whose PGCs inherited 2 H3K36me3(-) genomes from sperm to make a germline, and  
400 suggest that newly established H3K36me3 marking of H3K36me3(-) chromosomes by  
401 maternally loaded HMTs can enable PGCs to make a germline.

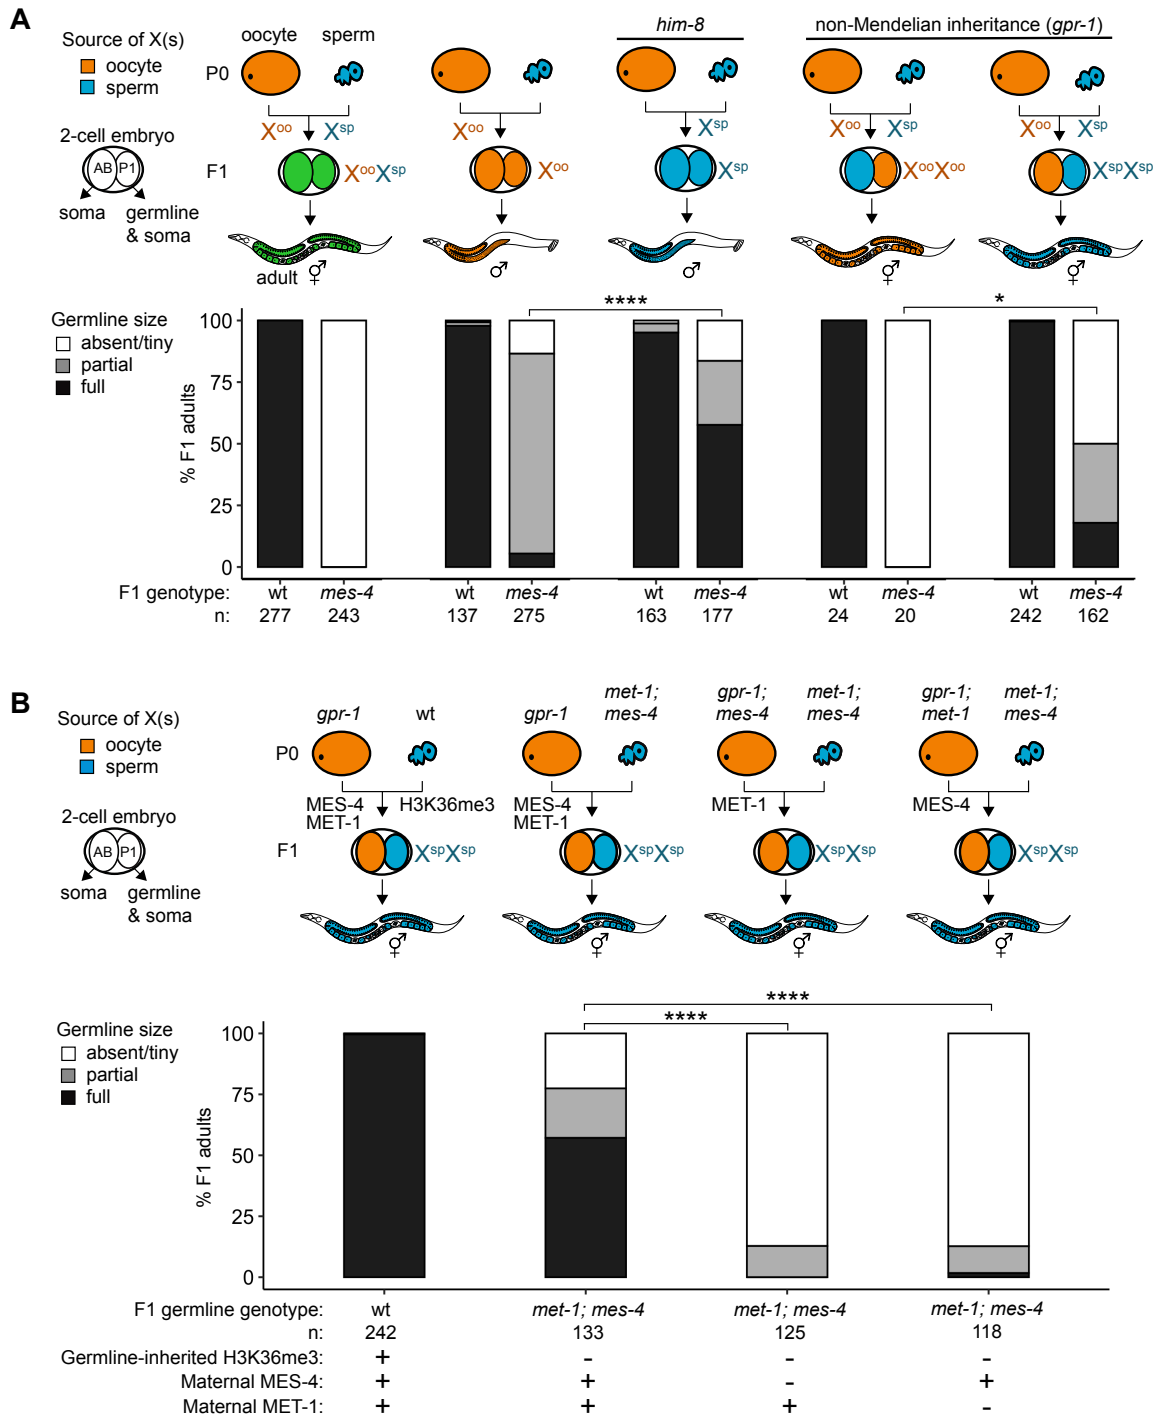

402

403

404

405

406

407

408

**Figure 3: Maternally loaded MES-4 promotes germline development by repressing the X chromosomes independently from transmitting H3K36me3 across generations.** (A,B) Bar plots showing distributions of germline size (absent/tiny, partial, and full) in worms with different X-chromosome compositions in their germline. Numbers of scored F1 offspring and the genotype of their germlines are indicated (*mes-4* indicates *mes-4* M-Z). 2-cell embryos contain AB (left) and P1 (right) blastomeres. AB generates some somatic tissues; P1 generates the germline and

409 some somatic tissues. Orange, blue, and green coloring indicate X chromosome compositions:  
410 orange is only oocyte-inherited X(s), blue is only sperm-inherited X(s), and green is 1 oocyte-  
411 inherited X and 1 sperm-inherited X. To generate ‘non-Mendelian’ F1 hermaphrodite offspring  
412 that inherited 2 genomes and therefore 2 Xs from one gamete, we mated fathers with mothers  
413 that carry a mutation in *gpr-1* (Besseling and Bringmann, 2016; Artiles et al., 2019). 2-tailed  
414 Fisher’s exact tests were used to test whether the proportion of F1 adults with a full-sized  
415 germline significantly differs between samples. P-value designations are \* < 0.01 and \*\*\*\* < 1e-  
416 5. (A) To generate F1 male offspring that inherited their single X from the sperm, we mated  
417 parents that carry the *him-8(e1489)* allele, which causes X-chromosome nondisjunction during  
418 oogenesis in the hermaphrodite. (B) Presence or absence of sperm-inherited H3K36me3  
419 marking, maternal MES-4, and maternal MET-1 in germlines of F1 offspring are indicated in the  
420 schematic of each cross and below each bar.

421  
422 Figure 3—figure supplement 1: Genetic strategies to generate and identify F1 offspring that  
423 inherited different X-chromosome endowments from parents.

424 Figure 3—figure supplement 2: *mes-4* M-Z+ X<sup>SP</sup>/X<sup>SP</sup> mutants do not have healthier germlines  
425 than *mes-4* M-Z- X<sup>SP</sup>/X<sup>SP</sup> mutants.

426 Figure 3—figure supplement 3: Further fertility analyses of *mes-4* M-Z- mutants that inherited  
427 their X(s) from the sperm.

428  
429  
430  
431  
432  
433  
434  
435  
436  
437  
438  
439  
440  
441  
442  
443  
444  
445  
446  
447  
448  
449  
450  
451  
452

## 453 **LIN-15B causes X mis-expression in germlines of *mes-4* M+Z- adults**

454  
455 MES-4 levels are low on the X chromosome(s) (Bender et al., 2006; Rechtsteiner et al., 2010;  
456 Furuhashi et al., 2010; Gaydos et al., 2012; Kreher et al., 2018). We therefore hypothesized that  
457 MES-4 represses X genes indirectly by regulating the expression or activity of 1 or more  
458 downstream factor(s). For example, MES-4's activity on autosomes may repress X genes by  
459 concentrating a transcriptional repressor onto the X or by sequestering a transcriptional  
460 activator away from the X (Gaydos et al., 2012; Cabianca et al., 2019; Georgescu et al., 2020).  
461 Several lines of evidence made the THAP transcription factor LIN-15B a strong candidate for  
462 causing X mis-expression in germlines that lack MES-4. First, our analysis of publicly available  
463 LIN-15B ChIP data from whole embryos and larvae found that LIN-15B targets the promoter of  
464 many X genes that are repressed by MES-4 in PGCs and/or EGCs (Figure 4 -- Supplement 1).  
465 Second, *lin-15B* is X-linked and UP in *mes-4* vs wt PGCs (Figure 2E,F and Figure 2—figure  
466 supplement 1). Third, LIN-15B has been reported to promote expression of X-linked genes in  
467 PGCs and adult germlines (Lee et al., 2017; Robert et al., 2020). Finally, *mes-4* and *lin-15B*  
468 genetically interact in somatic cells to control expression of germline genes such as genes  
469 encoding P-granule components (Petrella et al., 2011).

470 We hypothesized that LIN-15B causes mis-expression of X genes in germlines that lack  
471 MES-4. To test our hypothesis, we used RNA-seq to determine whether gonads dissected from  
472 *mes-4* M+Z-; *lin-15B* M-Z- double mutant adults have reduced levels of X mis-expression  
473 compared to gonads dissected from *mes-4* M+Z- single mutant adults. Our differential  
474 expression analyses showed that *mes-4* M+Z-; *lin-15B* M-Z- adult gonads up-regulate  
475 considerably fewer X genes (112 X genes) than *mes-4* M+Z- adult gonads (367 X genes) (Figure  
476 4A and Figure 4—figure supplement 2A). Furthermore, the 367 X-UP genes in *mes-4* M+Z- adult  
477 gonads had closer-to-wild-type transcript levels in *mes-4* M+Z-; *lin-15B* M-Z- adult gonads  
478 (Figure 4B), and 323 of those X-UP genes were scored as X-DOWN in *mes-4* M+Z-; *lin-15B* M-Z-  
479 compared to *mes-4* M+Z- (Figure 4C and Figure 4—figure supplement 1C). Our results show  
480 that LIN-15B is responsible for much of the X mis-expression in *mes-4* M+Z- adult gonads.

481

482

## 483 **LIN-15B causes sterility in *mes-4* M-Z- mutants**

484

485 Since LIN-15B causes X mis-expression in *mes-4* M+Z- adult gonads, we hypothesized that  
486 removal of LIN-15B would allow *mes-4* M-Z- mutants to make healthier germlines. We  
487 compared germline health in *mes-4* M-Z- mutant hermaphrodite adults with an  $X^{SP}/X^{SP}$   
488 germline, comparing those that had maternal and zygotic LIN-15B (*lin-15B* M+Z+) and those  
489  $X^{SP}/X^{SP}$  mutant hermaphrodite adults and those that lacked either maternal LIN-15B (*lin-15B* M-  
490 Z+), zygotically synthesized LIN-15B (*lin-15B* M+Z-), or both (*lin-15B* M-Z-). We found that  
491 removal of either maternal LIN-15B, zygotic LIN-15B, or both caused more *mes-4* M-Z-  $X^{SP}/X^{SP}$   
492 germlines to be full-sized (Figure 4D). Notably, loss of maternal LIN-15B caused better recovery  
493 of germline health than loss of zygotic LIN-15B, and loss of both had an additive effect.  
494 Strikingly, 88% of *mes-4* M-Z-; *lin-15B* M-Z-  $X^{SP}/X^{SP}$  germlines were full-sized. We conclude that  
495 both maternal and zygotic sources of the transcription factor LIN-15B cause germline loss in  
496 *mes-4* M-Z- mutants.

497 Removal of LIN-15B may only allow *mes-4* M-Z- mutant hermaphrodites to make a full-  
498 sized germline if that germline inherited 2 X chromosomes with a history of repression (from  
499 sperm), which by itself improves germline health in *mes-4* M-Z- mutants (Figure 3A, Figure 4D).  
500 We analyzed the impact of loss of LIN-15B on germline health in  $X^{oo}/X^{sp}$  mutants that inherited  
501 1 of their 2 X chromosomes with a history of expression (from the oocyte). We found that 29%  
502 of *mes-4* M-Z-; *lin-15B* M-Z-  $X^{oo}/X^{sp}$  adult mutant hermaphrodites made full-sized germlines  
503 compared to 0% of *mes-4* M-Z-; *lin-15B* M+Z+ adult mutant hermaphrodites (Figure 4—figure  
504 supplement 3). This finding demonstrates that removal of LIN-15B can even allow *mes-4* M-Z-  
505  $X^{oo}/X^{sp}$  mutants to make a full-sized germline.

506 To investigate whether other factors contribute to sterility in *mes-4* M-Z- mutants, we  
507 identified candidate genes that met 1 or more of 3 criteria: 1) they are X-linked and UP in *mes-4*  
508 PGCs and/or EGCs, 2) there is evidence of them binding to the promoter region of at least 25%  
509 of X-linked UP genes, and 3) they target a DNA motif that is enriched in the promoter of X-  
510 linked UP genes (Figure 4—figure supplement 1). We identified 20 top candidates based on the  
511 above criteria plus 4 histone acetyltransferases (HATs) that are involved in transcriptional  
512 activation and tested whether their depletion by RNAi causes *mes-4* M-Z- mutants to make  
513 healthier germlines. Of the 21 genes tested, only RNAi depletion of LIN-15B caused *mes-4* M-Z-  
514 mutants to make healthier germlines (Figure 4—figure supplement 1). We conclude that LIN-  
515 15B is a major contributor to germline death in *mes-4* M-Z- mutants.

516  
517  
518  
519  
520  
521  
522  
523  
524  
525  
526  
527  
528  
529  
530  
531  
532



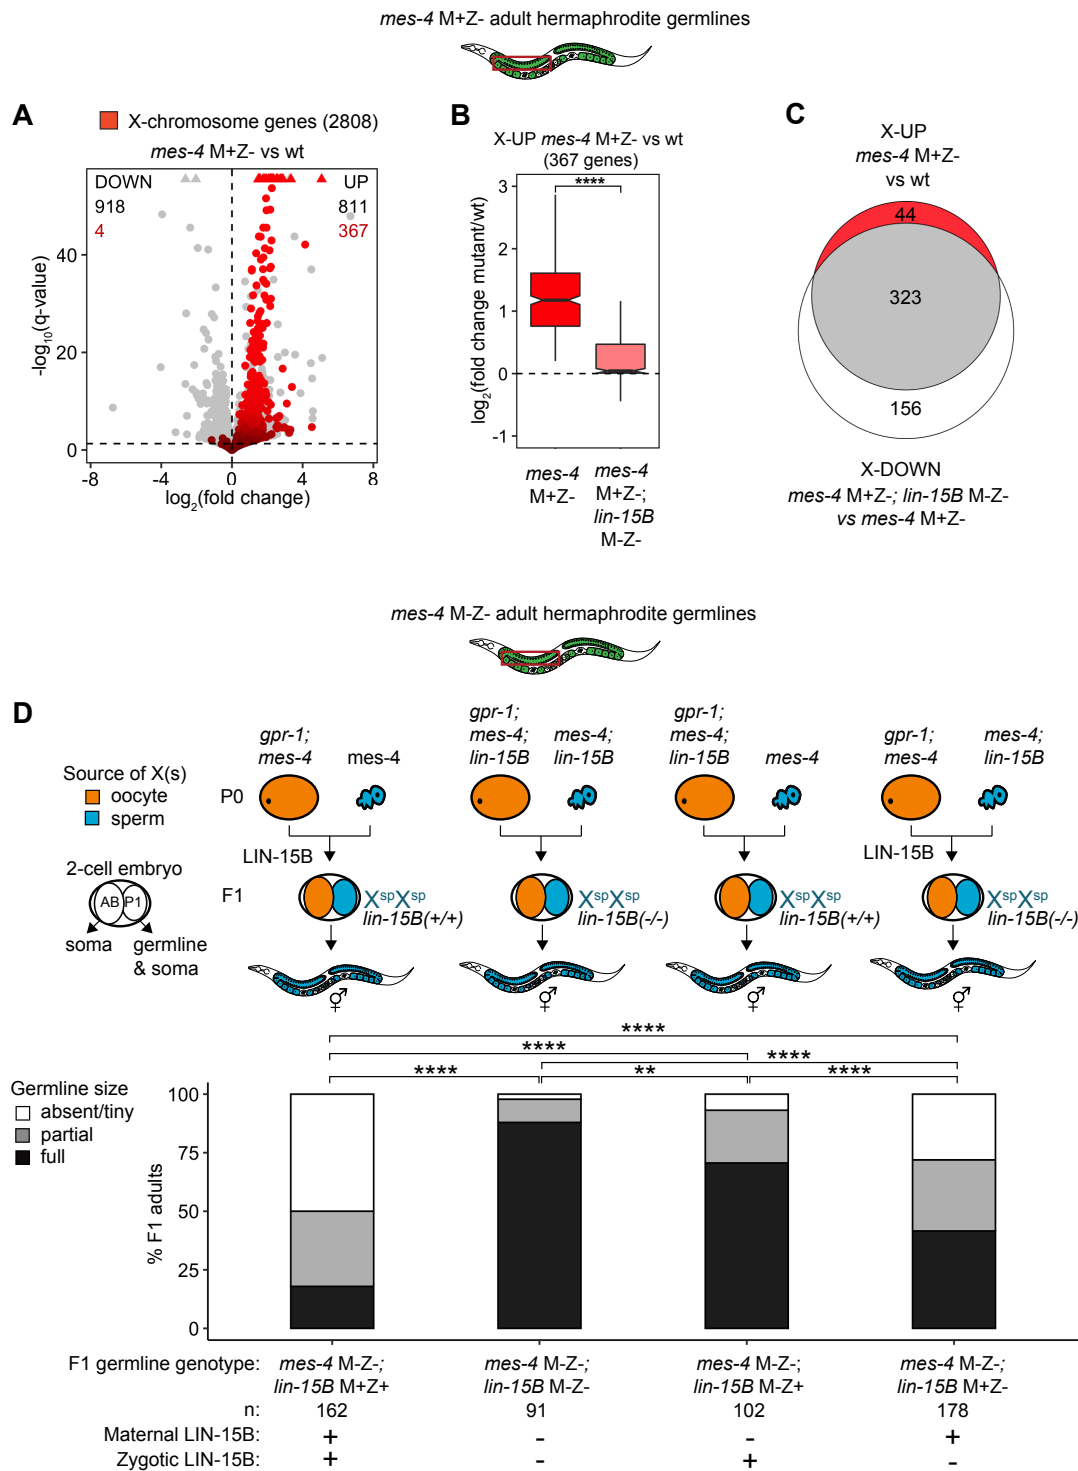

533  
 534 **Figure 4: Loss of LIN-15B reduces X mis-expression in *mes-4* M+Z- adult germlines and**  
 535 **suppresses germline death in *mes-4* M-Z- mutants.** (A) Volcano plot showing  $\log_2(\text{fold change})$   
 536 of transcript abundance and significance [ $\log_{10}(q\text{-value})$ ] for 20,258 protein-coding genes  
 537 (circles) between gonads dissected from *mes-4* M+Z- vs wild-type (wt) adults. Genes that  
 538 exceed the plot scale (triangles) are set at the maximum value of the scale. X-chromosome

539 genes (2808) are red. Genes above the horizontal line (q-value of 0.05) are considered  
540 significantly mis-regulated. The number of all mis-regulated protein-coding genes (black) and  
541 the number of those that are X-linked (red) are indicated in the corners; left is downregulated  
542 (DOWN) and right is upregulated (UP) in *mes-4* M+Z- vs wt. (B) Boxplots showing  $\log_2$ (fold  
543 change) in transcript abundance for the 367 X-UP genes in *mes-4* M+Z- vs wt gonads between  
544 *mes-4* M+Z- vs wt gonads (red) and between *mes-4* M+Z-; *lin-15B* M-Z- vs wt gonads (pink).  
545 Boxplots show the median, the 25<sup>th</sup> and 50<sup>th</sup> percentiles (boxes), and the 2.5<sup>th</sup> and 97.5<sup>th</sup>  
546 percentiles (whiskers). Waists around the median indicate 95% confidence intervals. Mann-  
547 Whitney tests were used to compare samples. (C) Venn diagram comparing the 367 X-UP genes  
548 in *mes-4* M+Z- vs wt and the 479 X-DOWN genes in *mes-4* M+Z-; *lin-15B* M-Z- vs *mes-4* M+Z-  
549 gonads. (D) Bar plots as described in the legend of Figure 3. Genotypes of hermaphrodite and  
550 male parents are indicated at the top. All scored F1 offspring are non-Mendelian segregants  
551 (caused by the *gpr-1* mutation in mother worms) whose germline inherited 2 genomes and  
552 therefore 2 Xs from the sperm. The F1 germline's genotype with respect to *lin-15B* is indicated  
553 to the right of the 2-cell embryos; '+' is wild-type allele, '-' is null allele. The presence or  
554 absence of maternal LIN-15B and zygotic LIN-15B in the germline of F1 offspring is indicated in  
555 the schematic of each cross and below each bar. 2-sided Fisher's exact tests were used to test  
556 whether the proportion of F1 adults with a full-sized germline significantly differed between  
557 samples. P-value designations are \*\* < 0.001, \*\*\*\* < 1e-5.

558  
559

560 Figure 4—figure supplement 1: Identification and testing of candidate transcription factors for a  
561 role in causing sterility of *mes-4* M-Z- mutants.

562 Figure 4—figure supplement 2: Further analysis of how LIN-15B impacts the transcriptome of  
563 *mes-4* M+Z- dissected adult germlines.

564 Figure 4—figure supplement 3: Removal of LIN-15B improves germline health in *mes-4* M-Z-  
565 X<sup>oo</sup>/X<sup>sp</sup> mutant hermaphrodites.

566

567

568

569

570

571

572

573

574

575

576

577

578

579

580

581

582

## 583 **MES-4 cooperates with the chromatin regulator PRC2 to repress X genes**

584

585 In addition to MES-4, the maternally loaded H3K27 HMT Polycomb Repressive Complex 2  
586 (PRC2), composed of MES-2, MES-3, and MES-6, promotes germline survival and development  
587 by repressing genes on the X chromosome (Gaydos et al., 2012; Gaydos et al., 2014). To test if  
588 MES-4 and PRC2 cooperate to protect germline health by repressing a similar set of X genes, we  
589 compared transcript profiles in wild-type (wt), *mes-3* M-Z-, and *mes-4* M-Z- PGCs and EGCs. In  
590 Principal Component Analysis (PCA), the top 2 principal components captured 41% of the  
591 variance across all samples and clustered *mes-4* and *mes-3* mutant samples together by  
592 germline stage and away from wild-type samples (Figure 5A). Using differential expression  
593 analysis, we identified 354 X genes UP in *mes-3* vs wt PGCs and 443 X genes UP in *mes-3* vs wt  
594 EGCs. We found that stage-matched *mes-3* and *mes-4* samples up-regulate a highly similar set  
595 of X genes (Figure 5B-C). Next, we compared  $\log_2$ (fold change) (mutant vs wt) of mis-regulated  
596 X genes between *mes-4* and *mes-3* PGCs and between *mes-4* and *mes-3* EGCs. We found a  
597 positive, albeit small, correlation between PGCs (0.22 Spearman's correlation coefficient) and a  
598 stronger correlation between EGCs (0.44 Spearman's correlation coefficient) (Figure 5D-E).  
599 Moreover, as in *mes-4* M-Z- mutants, loss of LIN-15B caused *mes-3* M-Z- mutants to make  
600 healthier germlines (Figure 4—figure supplement 3). We conclude that MES-4 and PRC2  
601 cooperate to ensure germline survival in M-Z- mutant larvae by repressing similar sets of X  
602 genes and that both operate through LIN-15B.

603

604 The chromodomain protein MRG-1 is a candidate reader and effector of H3K36me3  
605 that, like MES-4 and PRC2, promotes germline development by repressing X genes (Fujita et al.,  
606 2002; Takasaki et al., 2007). To test if MRG-1 represses the same set of X genes as MES-4 and  
607 PRC2, we profiled transcripts from PGCs hand-dissected from *mrg-1* M-Z- L1 larvae. We found  
608 that *mrg-1* PGCs mis-express 440 X genes, 225 of which are also mis-expressed in *mes-4* and  
609 *mes-3* PGCs and EGCs (Figure 5—figure supplement 1). These findings add MRG-1 to the team  
610 of maternal regulators that ensure PGC survival and health by repressing the X.

611

612

613

614

615

616

617

618

619

620

621

622

623

624

625

626

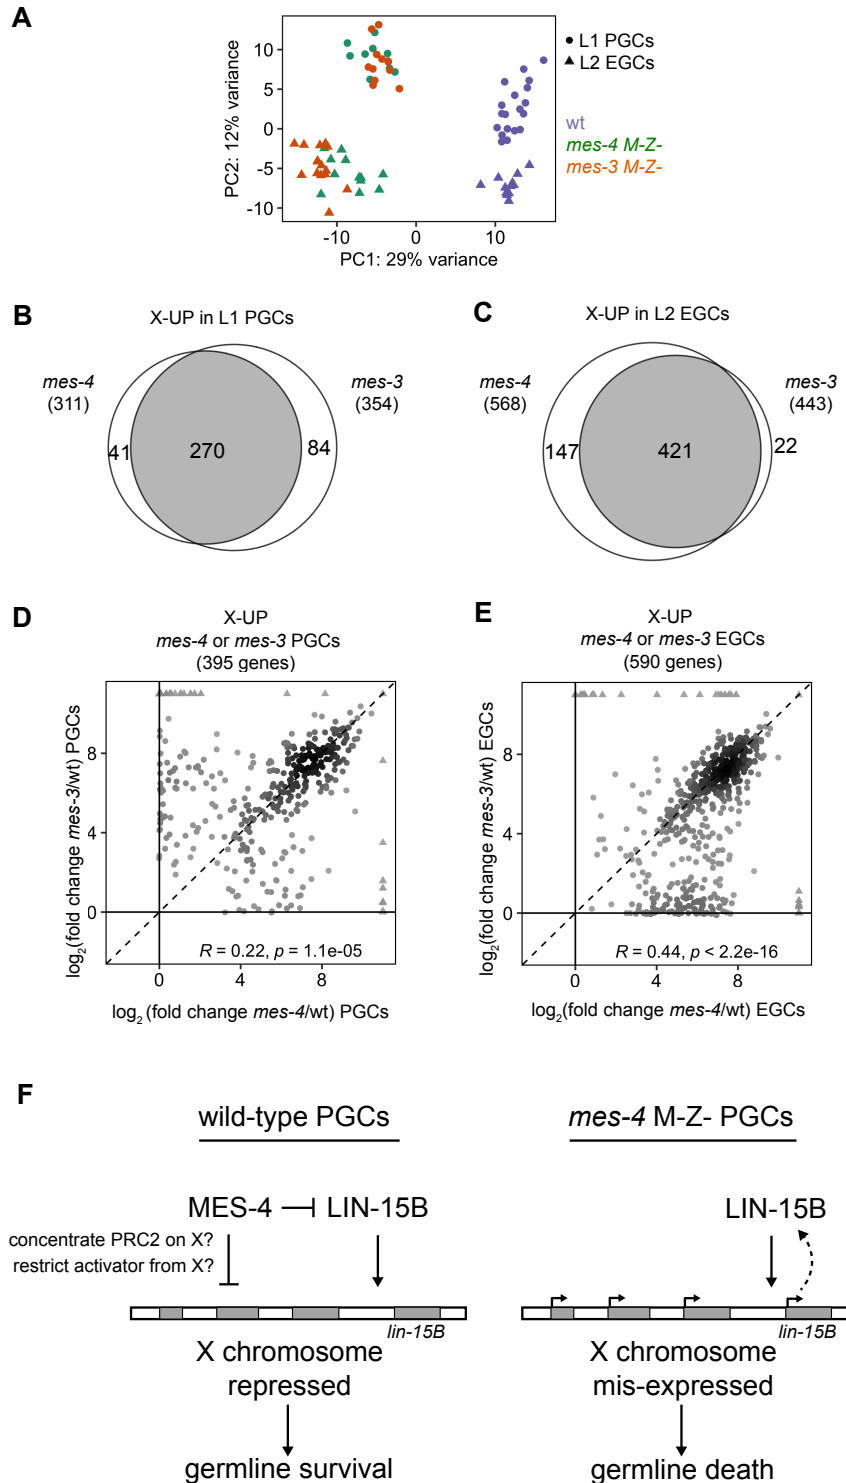

627

628

629 **Figure 5: *mes-4* M-Z- and *mes-3* M-Z- nascent germlines mis-express a highly similar set of X**

630 **genes.** (A) Principal Component Analysis (PCA) including all replicates of wt (blue), *mes-4* M-Z-

631 (green), and *mes-3* M-Z- (dark orange) PGCs (circles) and EGCs (triangles). The percentages of total variance across all samples described by the top 2 principal components are indicated.

632 (B,C) Venn diagrams comparing X-UP genes (mutant vs wt) in *mes-4* and *mes-3* PGCs (B) and in  
633 *mes-4* and *mes-3* EGCs (C). (D,E) Scatterplots comparing  $\log_2$ (fold change) (mutant vs wt) of  
634 transcript abundance for X-UP genes (circles) in *mes-4* or *mes-3* PGCs (D) or in *mes-4* or *mes-3*  
635 EGCs (E). The Spearman correlation coefficient along with its p-value is indicated at the top of  
636 each scatterplot. (F) Cartoon model illustrating how MES-4 protects germline survival by  
637 repressing X genes (gray boxes). MES-4 may indirectly repress X genes, including *lin-15B*, by  
638 concentrating a repressor (e.g. PRC2) on the X or by restricting an activator (e.g. histone  
639 acetyltransferase or LIN-15B) from the X. Our findings identify LIN-15B as a key player in  
640 activating X genes and causing germline death upon loss of MES-4. LIN-15B may activate X  
641 genes directly by binding to those genes or indirectly by regulating 1 or more other  
642 transcription factors.

643  
644 Figure 5—figure supplement 1: Comparison of X mis-expression in PGCs and EGCs dissected  
645 from various chromatin regulator mutants.

646  
647  
648  
649  
650  
651  
652  
653  
654  
655  
656  
657  
658  
659  
660  
661  
662  
663  
664  
665  
666  
667  
668  
669  
670  
671  
672  
673  
674  
675

676 **DISCUSSION**

677

678 In this study, we investigated how a maternally supplied chromatin regulator protects germline  
679 immortality and promotes germline health. We found that nascent *C. elegans* germlines (PGCs  
680 and EGCs) that completely lack maternal MES-4 mis-express over a thousand genes, most of  
681 which are on the X chromosome. We further demonstrated that X mis-expression is the cause  
682 of germline death in *mes-4* M-Z- mutants. Removal of a single transcription factor, LIN-15B,  
683 reduced X mis-expression in the germline of *mes-4* mutant mothers (*mes-4* M+Z-) and was  
684 sufficient to allow most of their offspring (*mes-4* M-Z-) to develop full-sized germlines.

685 Intriguingly, *lin-15B* is itself X-linked and mis-expressed in nascent germlines that lack MES-4,  
686 highlighting *lin-15B* as a key target for MES-4 repression. We favor a model where maternal  
687 MES-4 promotes offspring germline development by preventing LIN-15B from activating a  
688 germline-toxic program of gene expression from the X chromosome (Figure 5F). This work  
689 underscores how maternally supplied factors can guide development of specific tissues in  
690 offspring by protecting their transcriptome.

691

692 Maternal MES-4 binds to ~5000 genes in embryos (Rechtsteiner et al., 2010), many of which  
693 were previously expressed in the maternal germline and need to be expressed in the offspring  
694 germline. Yet surprisingly, lack of MES-4 does not impact the expression of most germline genes  
695 in PGCs. Furthermore, our genetic findings show that *mes-4* mutants can develop a full-sized  
696 germline if they inherit X chromosomes that have a history of repression, demonstrating that  
697 MES-4 is not required for PGCs to launch a germline program. Interestingly, MES-4 is required  
698 for the mis-expression of germline genes in somatic tissues of several mutants, such as *spr-5*;  
699 *met-2*, *lin-15B*, and mutants of DREAM complex components (Wang et al., 2005; Petrella et al.,  
700 2011; Carpenter et al., 2021). This suggests that maternal MES-4 has tissue-dependent roles in  
701 gene regulation. Such context-dependent roles may be mediated by different H3K36me3  
702 'reader' complexes, as observed in other organisms (Yochum and Ayer, 2002; Cai et al., 2003;  
703 Chen et al., 2009). Our findings clarify the role of maternal MES-4 in regulating the  
704 transcriptome of newborn germlines.

705

706 There has been a concerted effort in recent years to determine how epigenetic inheritance  
707 impacts offspring health (e.g. Heard and Martienssen, 2014; Klosin et al., 2017; Tabuchi et al.,  
708 2018; Kaneshiro et al., 2019; Fitz-James and Cavalli, 2022). Maternal MES-4's role in  
709 propagating gamete-inherited H3K36me3 patterns through embryogenesis is a clear example of  
710 epigenetic inheritance (Kreher et al., 2018). By taking advantage of the *gpr-1* genetic tool, we  
711 demonstrated that inheritance of H3K36me3 patterns from parents is not required for offspring  
712 germline development. However, additional loss of either maternal MES-4 or maternal MET-1  
713 (the two H3K36 HMTs in *C. elegans*) rendered almost all worms sterile, suggesting an important  
714 role for H3K36me3 marking during early germline development. We speculate that maternal  
715 MES-4 and maternal MET-1 cooperate to allow germline development by restoring sufficient  
716 levels and proper patterns of H3K36me3 marking to chromosomes inherited lacking H3K36me3.  
717 In this scenario, we envision that maternal MET-1 first catalyzes new H3K36me3 marking on  
718 genes co-transcriptionally during the first wave of zygotic genome activation in PGCs (Furuhashi  
719 et al., 2010; Kreher et al., 2018), after which maternal MES-4 maintains MET-1-generated

720 patterns of H3K36me3 through early germline development to prevent germline death. The  
721 importance of H3K36me3 marking is also highlighted by our finding that loss of the candidate  
722 H3K36me3 ‘reader’ MRG-1 (homolog of yeast Eaf-3, fly MSL3, and human MRG15) (Gorman et  
723 al., 1995; Eisen et al., 2001; Cai et al., 2003; Bertram and Pereira-Smith, 2001; Joshi and Struhl,  
724 2005) causes PGCs to mis-express a set of X genes similar to that caused by loss MES-4 and also  
725 causes death of the nascent germline.

726  
727 Since MES-4 binding and its HMT activity are very low across almost the entire X chromosome  
728 (Rechtsteiner et al., 2010), it is likely that MES-4 regulates expression of X genes indirectly in  
729 PGCs. One possible mechanism for indirect regulation is that MES-4 generates H3K36me3 on  
730 autosomes to repel and concentrate a transcriptional repressor on the X chromosome(s). An  
731 attractive candidate repressor is the H3K27 HMT Polycomb Repressive Complex 2 (PRC2): in  
732 germlines, PRC2 activity is concentrated on the X chromosome(s) (Bender et al., 2004), PRC2  
733 represses a highly similar set of X genes as MES-4 (this work; Gaydos et al., 2012; Lee et al.,  
734 2017), and loss of PRC2 causes maternal-effect sterility, like loss of MES-4 (Capowski et al.,  
735 1991). H3K36me3’s role in antagonizing methylation of H3K27 is well documented (Schmitges  
736 et al., 2011; Yuan et al., 2011; Gaydos et al., 2012; Evans et al., 2016). An alternative possibility  
737 is that H3K36me3 in germlines sequesters a transcriptional activator on autosomes and away  
738 from the X chromosome(s) as it does to the histone acetyltransferase (HAT) CBP-1 in *C. elegans*  
739 intestinal cells (Cabianca et al., 2019; Georgescu et al., 2020).

740  
741 We identified the THAP transcription factor LIN-15B as a cause of X mis-expression in fertile  
742 germlines that lack MES-4 (*mes-4* M+Z- mutant mothers) and a major driver of germline death  
743 in their *mes-4* M-Z- mutant offspring. Interestingly, *lin-15B* is itself an X-linked gene that is mis-  
744 expressed in *mes-4* M-Z- mutant PGCs and EGCs. This suggests that although maternal MES-4  
745 regulates expression of thousands of genes in offspring germlines, it only needs to repress *lin-*  
746 *15B* to allow germline survival. However, there are likely additional factors besides LIN-15B that  
747 contribute to X mis-expression and germline death in *mes-4* M-Z- mutants, as removal of LIN-  
748 15B does not allow all *mes-4* M-Z- mutants to make full germlines. We tested whether RNAi  
749 depletion of 21 candidate transcription factors and HATs improves germline health in *mes-4*  
750 mutants; we found no hits other than LIN-15B. Recent studies found that upregulation of *lin-*  
751 *15B* also causes sterility in *nanos* mutants and *set-2* (H3K4 HMT) mutants and leads to up-  
752 regulation of other X genes (Lee et al., 2017; Robert et al., 2020). Those findings coupled with  
753 ours suggest that excessive LIN-15B activity causes germline-toxic levels of X-chromosome  
754 expression and that the germline uses multiple protective mechanisms to antagonize LIN-15B.

755  
756 Why is X mis-expression toxic to the germline? Our transcriptome analysis found that the X  
757 genes mis-expressed in *mes-4* M-Z- nascent germlines are highly enriched for genes that are  
758 normally turned on during oogenesis. This suggests the intriguing possibility that maternal MES-  
759 4 promotes germline development of PGCs by antagonizing an oogenesis program that  
760 interferes with the proliferative fate of PGCs. Since the oocyte-inherited X chromosome has a  
761 history of expression, it may be prone to turning on in, and thereby causing death of, offspring  
762 PGCs that lack MES-4. In support of this, offspring PGCs that lack MES-4 can develop into full-  
763 sized germlines if they inherit only X chromosomes that have a history of repression (from the

764 sperm). Our findings support a model where MES-4 prevents activation of the oocyte-inherited  
765 X chromosome in PGCs by opposing transcription factors such as LIN-15B.

766  
767 How LIN-15B causes X mis-expression in germlines that lack MES-4 is unclear. Several studies  
768 have focused on LIN-15B's role as a repressor of germline genes in somatic tissues (Wang et al.,  
769 2005; Petrella et al., 2011; Wu et al., 2012). Recently, LIN-15B was shown to promote  
770 repressive H3K9me2 marking in the promoter of germline-specific genes in somatic cells  
771 (Rechtsteiner et al., 2019). In germlines, LIN-15B may activate expression of X genes indirectly,  
772 e.g. by downregulating or antagonizing a repressor of X genes. Alternatively, LIN-15B may have  
773 context-dependent roles in gene expression, a well-known feature of many transcription factors  
774 (Fry and Farnham, 1999), and may directly activate expression of X genes. In support of this  
775 model, our analysis of LIN-15B ChIP data from whole embryos and larvae found that LIN-15B is  
776 associated with the promoter of many X genes that are repressed by MES-4 in newborn  
777 germlines. Clarification of LIN-15B's mode of action in germlines requires analysis of germline-  
778 specific chromatin patterns of LIN-15B binding, biochemical experiments, and identification of  
779 LIN-15B's functional partners.

780  
781 An outstanding question is what launches the germline program in *C. elegans* PGCs (Strome and  
782 Updike, 2015). MES-4 has been a prime candidate since it transmits H3K36me marking of  
783 germline genes from parent germ cells to offspring germ cells and so has been invoked as  
784 passing a 'memory of germline' across generations. Our findings disprove that "memory of  
785 germline" role for MES-4, since *mes-4* mutant PGCs turn on most germline genes normally and  
786 can undergo normal germline development if they inherit X chromosomes with a history of  
787 repression. Other attractive contenders for specifying the germline fate of PGCs have been  
788 germ granules and small RNAs. Several studies demonstrated that *C. elegans* germ granules  
789 (aka P granules) protect germline fate but are not needed to specify it (Gallo et al., 2010;  
790 Updike et al., 2014; Knutson et al., 2017). Among small RNAs, 22G small RNAs (22 bp long and  
791 starting with a G) are particularly attractive as possible germline determinants. They are bound  
792 to the argonaute CSR-1 and have been shown to target most germline-expressed genes and  
793 promote expression of some (Claycomb et al., 2009; Conine et al., 2010; Wedeles et al., 2013;  
794 Cecere et al., 2014). Complete loss of CSR-1 or DRH-3, an RNA helicase that generates 22G  
795 RNAs, causes sterility (Duchaine et al., 2006; Claycomb et al., 2009; Gu et al., 2009). However,  
796 hypomorphic mutations in the helicase domain of DRH-3 that abolish production of most 22G  
797 RNAs do not impact germline formation, suggesting that 22G RNAs are not needed to specify  
798 germline fate (Gu et al., 2009). We propose the intriguing possibility that in *C. elegans*, germline  
799 fate is the default, which must be protected in the germline (e.g. by MES proteins and P  
800 granules) and opposed in somatic tissues (e.g. by DREAM and LIN-15B).

801

## 802 MATERIALS AND METHODS

803

### 804 Worm strains

805

806 All worms were maintained at 20°C on Nematode Growth Medium (NGM) plates spotted with  
807 *E. coli* OP50 (Brenner, 1974). Strains generated (\*) and used in this study are listed below. GLH-



808 1 (Vasa) is a component of germ granules and is specifically and highly expressed in germline  
809 cells; *glh-1::GFP* was engineered into numerous strains to mark germ cells.  
810  
811 **DUP64** *glh-1(sams24[glh-1::GFP::3xFLAG]) I*  
812 **SS1491\*** *glh-1(sams24[glh-1::GFP::3xFLAG]) I; mes-4(bn73)/tmC12[egl-9(tmls1194)] V*  
813 **SS1293\*** *glh-1(sams24[glh-1::GFP::3xFLAG]) I; mrg-1(qa6200)/qC1[dpy-19(e1259) glp-1(q339)]*  
814 *III*  
815 **SS1492\*** *mes-3(bn199)/tmC20 [unc-14(tmls1219) dpy-5(tm9715)] glh-1(sams24[glh-*  
816 *1::GFP::3xFLAG]) I*  
817 **SS1476\*** *met-1(bn200)/tmC20[unc-14(tmls1219) dpy-5(tm9715)] glh-1(sams24[glh-*  
818 *1::GFP::3xFLAG]) I*  
819 **SS1494\*** *met-1(bn200)/tmC20[unc-14(tmls1219) dpy-5(tm9715)] glh-1(sams24[glh-*  
820 *1::GFP::3xFLAG]) I; mes-4(bn73)/tmC12[egl-9(tmls1197)] V*  
821 **SS1497\*** *glh-1(sams24[glh-1::GFP::3xFLAG]); oxTi421[eft-3p::mCherry::tbb-2 3'UTR + Cbr-unc-*  
822 *119(+)] X*  
823 **SS1514\*** *glh-1(sams24[glh-1::GFP::3xFLAG]); mes-4(bn73)/tmC12[egl-9(tmls1194)] V;*  
824 *oxTi421[eft-3p::mCherry::tbb-2 3'UTR + Cbr-unc-119(+)] X*  
825 **SS1503\*** *glh-1(sams24[glh-1::GFP::3xFLAG]) I; him-8(e1489) IV*  
826 **SS1500\*** *- glh-1(sams24[glh-1::GFP::3xFLAG]) I; him-8(e1489) IV; mes-4(bn73)/tmC12[egl-*  
827 *9(tmls1194)] V*  
828 **SS1498\*** *glh-1(sams24[glh-1::GFP::3xFLAG]) I; him-8(e1489) IV; oxTi421[eft-3p::mCherry::tbb-2*  
829 *3'UTR + Cbr-unc-119(+)] X*  
830 **SS1493\*** *glh-1(sams24[glh-1::GFP::3xFLAG]); him-8(e1489) IV; mes-4(bn73)/tmC12[egl-*  
831 *9(tmls1194)] V; oxTi421[eft-3p::mCherry::tbb-2 3'UTR + Cbr-unc-119(+)] X*  
832 **SS1515\*** *glh-1(sams24[glh-1::GFP::3xFLAG]) I; ccTi1594[mex-5p::GFP::gpr-1::smu-1 3'UTR + Cbr-*  
833 *unc-119(+), III: 680195] III; hJsi20[myo-2p::mCherry::unc-54 3'UTR] IV*  
834 **SS1516\*** *glh-1(sams24[glh-1::GFP::3xFLAG]) I; ccTi1594[mex-5p::GFP::gpr-1::smu-1 3'UTR + Cbr-*  
835 *unc-119(+), III: 680195] III; hJsi20[myo-2p::mCherry::unc-54 3'UTR] IV; mes-4(bn73)/tmC12[egl-*  
836 *9(tmls1194)] V*  
837 **SS1517\*** *glh-1(sams24[glh-1::GFP::3xFLAG]) I; ccTi1594[mex-5p::GFP::gpr-1::smu-1 3'UTR + Cbr-*  
838 *unc-119(+), III: 680195] III; hJsi20[myo-2p::mCherry::unc-54 3'UTR] IV; mes-4(bn73)/tmC12[egl-*  
839 *9(tmls1194)] V; lin-15B(n744) X*  
840 **SS1518\*** *met-1(bn200) glh-1(sams24[glh-1::GFP::3xFLAG]) I; ccTi1594[mex-5p::GFP::gpr-1::smu-*  
841 *1 3'UTR + Cbr-unc-119(+), III: 680195] III. hJsi20[myo-2p::mCherry::unc-54 3'UTR] IV*  
842 **SS1511\*** *glh-1(sams24[glh-1::GFP::3xFLAG]) I; mes-4(bn73)/tmC12[egl-9(tmls1194)] V; lin-*  
843 *15B(n744) X*  
844 **SS1512\*** *mes-3(bn199)/tmC20[unc-14(tmls1219) dpy-5(tm9715)] glh-1(sams24[glh-*  
845 *1::GFP::3xFLAG]) I; lin-15B(n744) X*  
846

#### 847 **Creation of *mes-3* and *met-1* null alleles by CRISPR-Cas9**

848  
849 The null alleles *mes-3(bn199)* and *met-1(bn200)* linked to *glh-1::GFP* were created by inserting  
850 TAACTAACTAAAGATCT into the 1st exon of each locus. The resulting genomic edit introduced a  
851 TAA stop codon in each reading frame, a frame shift in the coding sequence, and a BglII

852 restriction site (AGATCT) for genotyping. Alt-R crRNA oligos (IDT) were designed using CRISPOR  
853 (Concordet and Haeussler, 2018) and the UCSC Genome Browser (ce10) to produce highly  
854 efficient and specific Cas9 cleavage in the 1st exons of *mes-3* and *met-1*. Ultramer ssDNA oligos  
855 (IDT) containing 50 bp micro-homology arms were used as repair templates. A *dpy-10* co-  
856 CRISPR strategy (Arribere et al., 2014) was used to isolate strains carrying our desired  
857 mutations. Briefly, 2.0 uL of 100  $\mu$ M *mes-3* or *met-1* crRNA and 0.5 uL of 100  $\mu$ M *dpy-10* crRNA  
858 were annealed to 2.5 uL of 100  $\mu$ M tracrRNA (IDT) by incubation at 95°C for 2 minutes, then at  
859 room temperature for 5 minutes, to produce sgRNAs. sgRNAs were complexed with 5 uL of 40  
860  $\mu$ M Cas9 protein at room temperature for 5 minutes, 1 uL of 40  $\mu$ M *mes-3* or *met-1* repair  
861 template and 1 uL of 40  $\mu$ M *dpy-10(cn64)* repair template were added, and the mix was  
862 centrifuged at 13,000g for 10 minutes. All RNA oligos were resuspended in duplex buffer (IDT,  
863 #11-05-01-03). Mixes were injected into 1 or both gonad arms of ~30 DUP64 adults.  
864 Transformant progeny were isolated and back-crossed 4x to DUP64.

865

### 866 **Isolation of single sets of 2 sister PGCs or 2 EGCs**

867

868 L1 larvae hatched within a 30-minute window in the absence of food were allowed to feed for  
869 30 minutes to start PGC development. Larvae were partially immobilized in 15 uL drops of egg  
870 buffer (25 mM HEPES, pH 7.5, 118 mM NaCl, 48 mM KCl, 2 mM MgCl<sub>2</sub>, 2 mM CaCl<sub>2</sub>, adjusted to  
871 340 mOsm) on poly-lysine coated microscope slides and hand-dissected using 30-gauge needles  
872 to release their gonad primordium (consisting of 2 connected sister PGCs and 2 somatic gonad  
873 precursors). Germline-specific expression of GLH-1::GFP was used to identify PGCs, which were  
874 separated from gonad precursor cells by mouth pipetting using pulled glass capillaries coated  
875 with Sigmacote (Sigma, #SL2) and 1% BSA in egg buffer. 7.5 mg/mL pronase (Sigma, #P8811)  
876 and 5 mM EDTA were added to reduce sticking of gonad primordia to the poly-lysine coated  
877 slides and to weaken cell-cell interactions. Single sets of sister PGCs were transferred into 0.5 uL  
878 drops of egg buffer placed inside the caps of 0.5 mL low-bind tubes (USA Scientific, #1405-  
879 2600). Only PGCs that maintained bright fluorescence of GFP throughout isolation and were  
880 clearly separated from somatic gonad precursors were used for transcript profiling. Isolation of  
881 EGCs differed in 3 ways: 1) EGCs were dissected from L2 larvae that were fed for 20 hours after  
882 hatching, 2) the 2 EGCs that made up 1 sample may have come from different animals, and 3)  
883 the stage of each EGC could not be determined and therefore may have differed between  
884 samples. Tubes containing single sets of 2 sister PGCs or 2 EGCs were quickly centrifuged, flash  
885 frozen in liquid nitrogen, and stored at -80°C. A detailed protocol for isolating PGCs and EGCs  
886 from larvae is available upon request. At least 11 samples (replicates) of PGCs or EGCs were  
887 isolated for each condition.

888

### 889 **Isolation of RNAs from adult germlines**

890

891 1st day hermaphrodite and male adult worms (approximately 20-24 hours post-mid-L4 stage)  
892 were cut open with 30-gauge needles in egg buffer (see recipe above, except not adjusted to  
893 340 mOsm) containing 0.1% Tween and 1 mM levamisole to extrude their gonads. Gonads were  
894 cut at the narrow 'bend' to separate the gonad region containing mitotic and early meiotic  
895 germ cells from the region that contains oocytes and/or sperm; the former was used for RNA

896 profiling. 20-60 gonads were mouth pipetted into 500  $\mu$ L Trizol reagent (Life Technologies,  
897 #15596018), flash-frozen in liquid nitrogen, and stored at  $-80^{\circ}\text{C}$  for up to 1 month before RNA  
898 extraction.

899 To release RNAs from gonads in Trizol, gonads were freeze-thawed 3x using liquid  
900 nitrogen and a  $37^{\circ}\text{C}$  water bath, while vortexing vigorously between cycles. RNAs immersed in  
901 Trizol were added to phase-lock heavy gel tubes (Brinkmann Instruments, INC., #955-15-404-5)  
902 and mixed with 100  $\mu$ L of 1-bromo-3-chloropropane (BCP) (Sigma, #B9673), followed by room  
903 temperature incubation for 10 minutes. Samples were then centrifuged at 13,000g and  $4^{\circ}\text{C}$  for  
904 15 minutes to separate phases. RNAs in the aqueous phase were precipitated by mixing well  
905 with 0.7-0.8x volumes of ice-cold isopropanol and 1  $\mu$ L 20 mg/mL glycogen, followed by  
906 incubation at  $-80^{\circ}\text{C}$  for 1-2 hours and centrifugation at 13,000g at  $4^{\circ}\text{C}$  for 30 minutes. RNA  
907 pellets were washed 3x with ice-cold 75% ethanol and then resuspended in 15  $\mu$ L water. RNA  
908 concentration was determined by a Qubit fluorometer.

909

### 910 **Generation of cDNA sequencing libraries**

911

912 *PGCs and EGCs:* Immediately after thawing PGCs and EGCs on ice, a 1:4,000,000 dilution of  
913 ERCC spike-in transcripts (Life Technologies, #4456740) was added to each sample. Double-  
914 stranded cDNAs from polyA(+) RNAs were generated using a SMART-seq method that combined  
915 parts of the Smart-seq2 (Picelli et al., 2014) and SMART-Seq v4 (Takara) protocols. Briefly, PGCs  
916 and EGCs were lysed at room temperature for 5 minutes in lysis buffer (Takara Bio, #635013)  
917 containing RNase inhibitors (Takara Bio, #2313) to release mRNAs into solution. 1.2  $\mu$ M custom  
918 DNA primer (IDT) was annealed to transcripts' polyA tails by incubating samples at  $72^{\circ}\text{C}$  for 3  
919 minutes and then immediately placing them on ice. Reverse transcription to generate double-  
920 stranded cDNA was performed using 200 U SmartScribe, 1x first-strand buffer, 2 mM DTT  
921 (Takara Bio, #639537), 1 mM dNTPs (Takara Bio, #639125), 4 mM  $\text{MgCl}_2$ , 1 M betaine (Sigma,  
922 #B0300), 20 U RNase Inhibitor (Takara Bio, #2313), and 1.2  $\mu$ M custom template-switching  
923 oligo with a Locked Nucleic Acid analog (Qiagen) at  $42^{\circ}\text{C}$  for 90 minutes, followed by  $70^{\circ}\text{C}$  for 15  
924 minutes to heat-inactivate the reverse transcriptase. cDNAs were PCR-amplified according to  
925 Takara's SMART-Seq v4 protocol for 20 cycles using SeqAmp DNA Polymerase (Takara Bio,  
926 #638504) and a custom PCR primer. Amplified cDNAs were purified by SPRI using 1x Ampure XP  
927 beads (Agencourt, #A63881) and quantified using a Qubit fluorometer. All custom oligos  
928 contained a biotin group on their 5' end to ameliorate oligo concatemerization. Illumina's  
929 Nextera XT kit (Illumina, #FC-131-1096) was used with 350-400 pg cDNA as input to prepare  
930 dual-indexed Illumina RNA-sequencing libraries according to the manufacturer's instructions.  
931 Libraries were PCR-amplified for 14 cycles and purified by SPRI using 0.6x Ampure XP beads.

932

933 *Adult germlines:* Illumina libraries were prepared from polyA(+) RNAs using the NEBNext  
934 Poly(A) mRNA Magnetic Isolation Module (NEB, #E7490) and the NEBNext Ultra RNA Library  
935 Prep Kit (NEB, #E7530) according to the manufacturer's instructions. 100 ng total RNA was used  
936 to generate cDNAs, which were then amplified using 15 cycles of PCR.

937

938 Library concentration was measured by a Qubit fluorometer, and average fragment size was  
939 measured by a bioanalyzer or tapestation. Libraries were multiplexed and paired-end

940 sequenced with 50 cycles on either an Illumina HiSeq2500 or NovaSeq 6000 SP flow cell at the  
941 QB3 Vincent J. Coates Genomics Sequencing Laboratory at UC Berkeley.

942

### 943 **Processing and analysis of RNA-seq data**

944

945 *PGCs and EGCs:* Paired-end Illumina sequencing reads were aligned to the ce10 (WS220)  
946 genome downloaded from Ensembl using Hisat2 (2.2.1). Samtools (1.10) was used to remove  
947 duplicate reads and reads with low mapping quality (MAPQ < 10) from the alignment file. The  
948 function featureCounts from the subread package (2.0.1) (Liao et al., 2014) was used to obtain  
949 gene-level read (fragment) counts using a ce10 (WS220) transcriptome annotation file  
950 (Ensembl), which additionally contained 92 ERCC spike-in transcripts. 11 low-quality transcript  
951 profiles that were likely caused by a failure to capture mRNAs from 2 PGCs or EGCs, a well-  
952 known problem in single-cell RNA-sequencing, were identified using the R package scuttle  
953 (1.2.0) (McCarthy et al., 2017). For details of the transcript profiles generated in this study,  
954 including which were filtered out of our analysis, see our NCBI GEO accession (GSE198552). The  
955 R package DESeq2 (1.32.0) (Love et al., 2014) was used to perform Wald tests that identified  
956 differentially expressed genes in mutant vs wild-type samples. P-values were adjusted for  
957 multiple hypothesis testing by the Benjamini-Hochberg method to produce q-values. Genes  
958 with a q-value < 0.05 were considered differentially expressed. The scaling factors used by  
959 DESeq2 to normalize transcript profiles were calculated using the R package scran (1.20.1),  
960 which uses a pooling and deconvolution approach to deal with zero-inflation in low-input RNA-  
961 seq data (Lun et al., 2016). Bigwig files containing normalized read coverage over the  
962 WS220/ce10 genome were generated by bamCoverage from deepTools (Ramirez et al., 2016)  
963 using library scaling factors computed by scran, a bin size of 5, and a smoothing window of 15.  
964 Average read coverage across replicates was computed using WiggleTools (Zerbino et al., 2014)  
965 and visualized on the UCSC Genome Browser. Principal Component Analysis (PCA) was  
966 performed using DESeq2's plotPCA function and variance-stabilized counts from DESeq2's vst  
967 function. All visualizations of RNA-seq data were generated by the R packages ggplot2 (3.3.5)  
968 and ggpubr (0.4.0) or the UCSC Genome Browser.

969

970 *Adult germlines:* For transcript profiles from dissected adult germlines, data were processed as  
971 described above except the scaling normalization factors were computed by DESeq2.

972

### 973 **Gene sets**

974

975 The germline-specific and germline-enriched gene sets were previously defined in Rechtsteiner  
976 et al. 2010 and Reinke et al. 2004, respectively. The soma-specific gene set was previously  
977 described in Knutson et al., 2017 and refined in this study by removing genes that have >5 TPM  
978 in our RNA-seq data from wild-type dissected adult germlines. The oogenesis and  
979 spermatogenesis gene sets were previously defined in Ortiz et al. 2014. Oogenesis genes are  
980 expressed at higher levels in dissected adult oogenic germlines than dissected adult  
981 spermatogenic germlines; spermatogenesis genes are the opposite.

982

### 983 **Single-molecule fluorescence in-situ hybridization (smFISH) in L1 larvae**

984  
985 100-200 gravid adult mothers were allowed to lay offspring in drops of S basal overnight.  
986 Starvation-synchronized L1 offspring were collected and fed HB101 bacteria in S basal for 5  
987 hours. Fed L1s were washed 3-4 times with S basal to remove bacteria and then used for  
988 smFISH using the protocol described in Ji and van Oudenaarden, 2012 with a few  
989 modifications. Briefly, L1s were fixed with 3.7% formaldehyde for 45 minutes at room  
990 temperature, followed by 3 washes with PBS-Tween (0.1%). Fixed L1s were incubated in 75%  
991 ethanol at 4°C overnight and up to 3 days. RNAs were hybridized to 25 nM RNA probe sets in  
992 hybridization buffer (2x SSC, 10% formamide, 0.1% Tween-20, and 0.1 g/mL dextran sulfate) at  
993 37°C overnight. Afterwards, larvae were washed 2x in hybridization buffer at 37°C for 30  
994 minutes, the second of which included 1 ng/uL of DAPI. Larvae were washed 3x in PBS-Tween  
995 (0.1%) and mounted in anti-fade medium consisting of n-propyl gallate and Vectashield (Vector  
996 Laboratories, #H-1000). Mounted samples were immediately imaged on a spinning disk  
997 confocal microscope using a 100x oil objective to acquire 3D Z-stacks of PGCs; only Z-slices  
998 containing GLH-1::GFP signal were imaged. All RNA probe sets were conjugated to Quasar 670  
999 fluorescent dye. We designed and purchased the *lsd-1*, *mbk-1*, *pek-1*, and *lin-15B* probe sets  
1000 from Stellaris. The *cpg-2*, *pgl-3*, and *chs-1* probe sets were gifts from Dr. Erin Osborne  
1001 Nishimura.

1002

### 1003 **Counting transcripts in 3D smFISH images**

1004

1005 To batch process raw smFISH 3D images into transcript abundance measurements in PGCs, a  
1006 custom pipeline written in Fiji (v2.1.0/1.53C) and MATLAB (R2020a) was developed. Much of  
1007 the MATLAB code and strategy was adapted from Raj et al. 2008 to create our pipeline. Images  
1008 were removed from downstream analyses if they were obviously very dim in all channels.  
1009 Numbers of analyzed PGCs per probe set per genotype are indicated in Figure 2. A Laplacian of  
1010 Gaussian (LoG) filter was used to enhance the signal-to-noise contrast in smFISH images. Those  
1011 filtered 3D images were thresholded by signal intensity to produce binary images. The  
1012 ‘imregionalmax’ function from the Imaging Processing Toolbox in MATLAB was used to find and  
1013 count regional maxima (transcript foci) in those binary images. To isolate and count regional  
1014 maxima in PGCs, a 2D binary image mask of the PGCs was generated in Fiji from a maximum-  
1015 intensity Z-projection of the GLH-1::GFP image channel and applied to all Z-slices in the 3D  
1016 smFISH images. Segmentation of PGCs to create the 2D mask was done in Fiji by first blurring Z-  
1017 projections using a large Gaussian kernel and then detecting edges in the blurred image. Mann-  
1018 Whitney tests were performed to compare transcript abundance between *mes-4* and wild-type  
1019 PGCs.

1020 To choose an appropriate signal intensity threshold for a 3D smFISH image, the number  
1021 of detected regional maxima across 100 increasingly stringent thresholds applied to the image  
1022 were plotted (Raj et al., 2008). In that plot, a range of thresholds that produced similar numbers  
1023 of detected regional maxima was identified, and a threshold within that range was selected.  
1024 Since threshold values were similar for all images within an image set (the collection of images  
1025 acquired on the same day and for one probe set), an averaged threshold (across 5 images) was  
1026 calculated and applied to all images in the set. Notably, threshold values were similar across

1027 different image sets. Manual counting of dots in a few smFISH images gave similar values as our  
1028 semi-automated pipeline.

1029

### 1030 **Germline size analysis**

1031

1032 All analyses were performed by live imaging 1st day adults (approximately 20-24 hours post-  
1033 mid-L4 stage) and evaluating germline size using the germline marker GLH-1::GFP. Adult  
1034 germlines were classified into 1 of 3 categories: (1) 'Full' if its size was similar to that of a wild-  
1035 type adult germline, (2) 'Partial' if it had at least ~15 GLH-1::GFP(+) germ cells but wasn't large  
1036 enough to be classified as 'full', and (3) 'Absent/tiny' if it had < 15 GLH-1::GFP(+) germ cells. In  
1037 rare ambiguous cases where a germline's size was intermediate between categories, the  
1038 germline was assigned to the category of the smaller size. To classify germline size for  
1039 hermaphrodites, which have 2 gonad arms, only the size of the larger gonad arm was  
1040 considered; in most cases, both gonad arms were similar in size. 2-tailed Fisher's exact tests  
1041 were performed to test whether the proportion of worms with a full germline is higher or lower  
1042 in 1 sample vs another sample.

1043 Confocal microscopy was used to acquire live images of scored germlines in adults. Live  
1044 adults were placed in a drop of 1 uL H<sub>2</sub>O and 1 uL polystyrene microspheres (Polysciences, Inc.,  
1045 #00876) and then immobilized on 6% agarose pads. Images were acquired in Z-stacks using a  
1046 20x air objective and then converted to Z-projections of maximum intensity using Fiji. DIC  
1047 projections were used to outline the body of worms.

1048

### 1049 **Gamete and progeny analysis**

1050

1051 To determine whether *mes-4* M-Z-  $X^{sp}$  males that made full-sized germlines also produced  
1052 sperm, we imaged ethanol-fixed and DAPI-stained males using a spinning disk confocal  
1053 microscope. Males were assigned to 1 of 3 bins by the number of sperm (small, dense DAPI-  
1054 stained bodies in the proximal region of the germline) they contained: 1) 0-10 sperm, 2) 10-50  
1055 sperm, or 3) >50 sperm. To determine whether *mes-4* M-Z-  $X^{sp}/X^{sp}$  hermaphrodites that made  
1056 full-sized germlines also produced progeny, live-imaging was used to determine if they  
1057 contained at least 1 egg in their uterus, after which single egg-containing hermaphrodites were  
1058 transferred to individual plates and scored for production of viable progeny. In this way,  
1059 hermaphrodites were assigned to 1 of 3 bins: 1) 'no eggs', 2) 'eggs' (but did not produce viable  
1060 progeny, and 3) 'eggs and progeny'. Only males and hermaphrodites with full-sized germlines  
1061 were considered in the analysis. We used 2-sided Fisher's exact tests to compare what  
1062 proportion of wild-type and *mes-4* M-Z- mutant males contained >50 sperm and  
1063 hermaphrodites contained 'eggs and progeny'. P-value designation is \*\* < 0.001.

1064

### 1065 **Tracking X-chromosome inheritance patterns**

1066

1067 Methods used to track X-chromosome inheritance are diagrammed in Figure 3—figure  
1068 supplement 1. To identify F1 male offspring that received their single X from the oocyte ( $X^{oo}$ ) or  
1069 the sperm ( $X^{sp}$ ), crosses were performed with 1 parent contributing an X-linked *eft-3p::mCherry*  
1070 transgene. F1 male offspring that inherited the transgene were easily distinguished by bright

1071 cytoplasmic mCherry fluorescence in their soma. A *gpr-1* over-expression allele was used to  
1072 generate F1 hermaphrodite offspring whose germline inherited either 2 genomes from the  
1073 sperm or 2 genomes from the oocyte (Besseling and Bringmann, 2016; Artiles et al., 2019).  
1074 Those non-Mendelian offspring were visually identified by patterns of mCherry fluorescence in  
1075 their pharyngeal muscle cells (*myo-2p::mCherry X*) (Figure 3—figure supplement 1).

1076

### 1077 **RNA interference (RNAi) depletion of gene products**

1078

1079 RNAi was performed by feeding worms *E. coli* HT115 bacteria that carry a gene target's DNA  
1080 sequence in the L4440 vector (Kamath and Ahringer, 2003). Most RNAi constructs were  
1081 obtained from the Ahringer RNAi library and sequence confirmed. *lin-15B*, *lsy-2*, *nfya-1*, *eor-1*,  
1082 and *sma-9* RNAi constructs were generated for this study. RNAi constructs were streaked onto  
1083 LB agar plates containing 100 ug/mL carbenicillin and 10 ug/mL tetracycline. Single clones were  
1084 cultured overnight (14-17 hours) at 37°C in LB and carbenicillin (100 ug/mL). The following day,  
1085 RNAi cultures were spotted onto 6-cm NGM plates containing 1 mM IPTG and 100 ug/mL  
1086 carbenicillin (both added by top spreading), and then left to dry for 2 days at room temperature  
1087 in the dark. To deplete both maternal load and embryo-synthesized gene product, we placed  
1088 L4-stage larval mothers onto RNAi plates, grew them 1 day to reach adulthood, then moved  
1089 those adults to new RNAi plates to lay offspring. RNAi was done at 20°C. Germline size was  
1090 scored in 1st day adult offspring as described above.

1091

### 1092 **Statistical analysis**

1093

1094 Sample sizes for worms scored for germline size and for images used to count transcripts in  
1095 smFISH analysis are indicated in the respective figures. Gene set enrichment analyses were  
1096 performed using hypergeometric tests in R and the DAVID Bioinformatics Resource 6.8 (Huang  
1097 et al., 2009). The sizes of gene sets used for those tests are noted in the respective figure  
1098 legends. P-value designations are \* < 0.01, \*\* < .001, \*\*\* < 1e-4, and \*\*\*\* < 1e-5.

1099

### 1100 **Spinning-disk confocal microscopy**

1101

1102 All images were acquired using a spinning-disk confocal microscope equipped with a Yokogawa  
1103 CSU-X1 confocal scanner unit, Nikon TE2000-E inverted stand, Hamamatsu ImageEM X2-CCD  
1104 camera, solid state 405, 488, 561, 640 nm laser lines, 460/50, 525/50, 593/40, 700/75 nm  
1105 (EM/BP) fluorescence filters, DIC, Nikon Plan Apo VC 20x/0.5 air objective, Nikon Plan Apo  
1106 100x/1.40 oil objective, and Micro-Manager software (1.4.20). Image processing for images was  
1107 done in Fiji (2.1.0/1.53C) and photoshop.

1108

### 1109 **Transcription factor analyses**

1110

1111 *Analyses of ChIP data:* Bed files containing transcription factor (TF) binding sites (ChIP-chip or  
1112 ChIP-seq 'peaks') across the ce10 genome were downloaded from the modENCODE (Gerstein et  
1113 al., 2010) and modERN (Kudron et al., 2018) websites. Each bed file was loaded into R and  
1114 converted into a GRanges object using the GenomicRanges package (Lawrence et al., 2013). TF

1115 binding sites were assigned to genes using the package CHIPSeeker (Yu et al., 2015). A TF  
1116 binding site was assigned to a gene if it overlapped with a gene's TSS region (500 bp upstream  
1117 of TSS). If a TF had more than 1 set of binding site data (e.g. 2 ChIP-seq experiments), each set  
1118 was processed separately and then the TF-assigned genes were merged. TFs enriched in  
1119 promoters of X-linked UP genes in *mes-4* PGCs and/or EGCs (584 genes) compared to all X-  
1120 linked genes (2808) were identified using hypergeometric tests (p-value < 0.05).

1121  
1122 *Analyses of DNA motifs:* Position-weight matrices for known *C. elegans* TF DNA motifs were  
1123 downloaded from the CisBP database (Weirauch et al., 2014). X-linked genes that contain a TF's  
1124 motif in their promoter (500 bp upstream of TSS) were identified using FIMO from the Meme  
1125 suite in R using default parameters (Grant et al., 2011). Motifs significantly enriched in  
1126 promoters of X-linked UP genes in *mes-4* PGCs or EGCs (584 genes) compared to all X-linked  
1127 genes (2808) were identified using hypergeometric tests (p-value < 0.05).

1128

#### 1129 **DATA AVAILABILITY**

1130

1131 All sequencing data generated in this study were deposited in NCBI GEO under accession  
1132 GSE198552.

1133

#### 1134 **ACKNOWLEDGEMENTS**

1135

1136 We thank past and present members of the Strome lab and Grant Hartzog for helpful  
1137 discussions, Ben Abrams for microscopy advice, and Joshua Arribere for help with statistical  
1138 analyses. We thank Erin Osborne Nishimura for kindly gifting RNA probe sets for smFISH. This  
1139 work was supported by NIH grants T32GM008646 and F31GM125305 to C.C. and R01GM34059  
1140 to S.S.

1141

#### 1142 **COMPETING INTERESTS**

1143

1144 We have no competing interests to disclose.

1145

#### 1146 **REFERENCES**

1147

1148 Arico JK, Katz DJ, van der Vlag J, Kelly WG (2011) **Epigenetic patterns maintained in early**  
1149 **Caenorhabditis elegans embryos can be established by gene activity in the parental germ**  
1150 **cells** *PLoS genetics* **7**:e1001391.

1151 <https://doi.org/10.1371/journal.pgen.1001391>

1152

1153 Arribere JA, Bell RT, Fu BX, Artiles KL, Hartman PS, Fire AZ (2014) **Efficient marker-free recovery**  
1154 **of custom genetic modifications with CRISPR/Cas9 in Caenorhabditis elegans** *Genetics*  
1155 **198**:837-846.

1156 <https://doi:10.1534/genetics.114.169730>

1157



- 1158 Artiles KL, Fire AZ, Frøkjær-Jensen C (2019) **Assessment and Maintenance of Unigametic**  
1159 **Germline Inheritance for *C. elegans*** *Developmental cell* **48**:827–839.e9.  
1160 <https://doi.org/10.1016/j.devcel.2019.01.020>  
1161
- 1162 Bender LB, Cao R, Zhang Y, Strome S (2004) **The MES-2/MES-3/MES-6 complex and regulation**  
1163 **of histone H3 methylation in *C. elegans*** *Current biology* **14**:1639–1643.  
1164 <https://doi.org/10.1016/j.cub.2004.08.062>  
1165
- 1166 Bender LB, Suh J, Carroll, CR, Fong Y, Fingerma IM, Briggs SD, Cao R, Zhang Y, Reinke V, Strome  
1167 S (2006) **MES-4: an autosome-associated histone methyltransferase that participates in**  
1168 **silencing the X chromosomes in the *C. elegans* germ line** *Development (Cambridge,*  
1169 *England)* **133**:3907–3917.  
1170 <https://doi.org/10.1242/dev.02584>  
1171
- 1172 Besseling J, Bringmann H (2016) **Engineered non-Mendelian inheritance of entire parental**  
1173 **genomes in *C. elegans*** *Nature biotechnology* **34**:982–986.  
1174 <https://doi.org/10.1038/nbt.3643>  
1175
- 1176 Bertram MJ, Pereira-Smith OM (2001) **Conservation of the MORF4 related gene family:**  
1177 **identification of a new chromo domain subfamily and novel protein motif** *Gene* **266**:111–121.  
1178 [https://doi.org/10.1016/s0378-1119\(01\)00372-9](https://doi.org/10.1016/s0378-1119(01)00372-9)  
1179
- 1180 Brenner S (1974) **The genetics of *Caenorhabditis elegans*** *Genetics* **77**:71–94.  
1181 <https://doi.org/10.1093/genetics/77.1.71>  
1182
- 1183 Cabianca DS, Muñoz-Jiménez C, Kalck V, Gaidatzis D, Padeken J, Seeber A, Askjaer P, Gasser SM  
1184 (2019) **Active chromatin marks drive spatial sequestration of heterochromatin in *C. elegans***  
1185 **nuclei** *Nature* **569**:734–739.  
1186 <https://doi.org/10.1038/s41586-019-1243-y>  
1187
- 1188 Cai Y, Jin J, Tomomori-Sato C, Sato S, Sorokina I, Parmely TJ, Conaway RC, Conaway JW (2003)  
1189 **Identification of new subunits of the multiprotein mammalian TRRAP/TIP60-containing**  
1190 **histone acetyltransferase complex** *The Journal of biological chemistry* **278**:42733–42736.  
1191 <https://doi.org/10.1074/jbc.C300389200>  
1192 .
- 1193 Capowski EE, Martin P, Garvin C, Strome S (1991) **Identification of grandchildless loci whose**  
1194 **products are required for normal germ-line development in the nematode *Caenorhabditis***  
1195 ***elegans*** *Genetics* **129**:1061–1072.  
1196 <https://doi.org/10.1093/genetics/129.4.1061>  
1197
- 1198 Carpenter BS, Lee TW, Plott CF, Rodriguez JD, Brockett JS, Myrick DA, Katz DJ  
1199 (2021) ***Caenorhabditis elegans* establishes germline versus soma by balancing inherited**  
1200 **histone methylation** *Development (Cambridge, England)* **148**:dev196600.  
1201 <https://doi.org/10.1242/dev.196600>

- 1202  
1203 Cecere G, Hoersch S, O'Keefe S, Sachidanandam R, Grishok A (2014) **Global effects of the CSR-**  
1204 **1 RNA interference pathway on the transcriptional landscape** *Nature structural & molecular*  
1205 *biology* **21**:358–365.  
1206 <https://doi.org/10.1038/nsmb.2801>  
1207  
1208 Chen M, Takano-Maruyama M, Pereira-Smith OM, Gaufo GO, Tominaga K (2009) **MRG15, a**  
1209 **component of HAT and HDAC complexes, is essential for proliferation and differentiation of**  
1210 **neural precursor cells** *Journal of neuroscience research* **87**:1522–1531.  
1211 <https://doi.org/10.1002/jnr.21976>  
1212  
1213 Claycomb JM, Batista PJ, Pang KM, Gu W, Vasale JJ, van Wolfswinkel JC, Chaves DA, Shirayama  
1214 M, Mitani S, Ketting RF, Conte D Jr, Mello, CC (2009) **The Argonaute CSR-1 and its 22G-RNA**  
1215 **cofactors are required for holocentric chromosome segregation** *Cell* **139**:123–134.  
1216 <https://doi.org/10.1016/j.cell.2009.09.014>  
1217  
1218 Concordet JP, Haeussler M (2018) **CRISPOR: intuitive guide selection for**  
1219 **CRISPR/Cas9 genome editing experiments and screens** *Nucleic Acids Research*  
1220 **46(W1)**:W242–W245.  
1221 <https://doi:10.1093/nar/gky354>  
1222  
1223 Conine CC, Batista PJ, Gu W, Claycomb JM, Chaves DA, Shirayama M, Mello CC (2010)  
1224 **Argonautes ALG-3 and ALG-4 are required for spermatogenesis-specific 26G-RNAs and**  
1225 **thermotolerant sperm in Caenorhabditis elegans** *Proceedings of the National Academy of*  
1226 *Sciences of the United States of America* **107**:3588–3593.  
1227 <https://doi.org/10.1073/pnas.0911685107>  
1228  
1229 Cui M, Chen J, Myers TR, Hwang BJ, Sternberg PW, Greenwald I, Han M (2006) **SynMuv genes**  
1230 **redundantly inhibit lin-3/EGF expression to prevent inappropriate vulval induction in C.**  
1231 **elegans** *Developmental cell* **10**:667–672.  
1232 <https://doi.org/10.1016/j.devcel.2006.04.001>  
1233  
1234 Delaney K, Strobino M, Wenda JM, Pankowski A, Steiner FA (2019) **H3.3K27M-induced**  
1235 **chromatin changes drive ectopic replication through misregulation of the JNK pathway in C.**  
1236 **elegans** *Nature communications* **10**:2529.  
1237 <https://doi.org/10.1038/s41467-019-10404-9>  
1238  
1239 Duchaine TF, Wohlschlegel JA, Kennedy S, Bei Y, Conte D Jr, Pang K, Brownell DR, Harding S,  
1240 Mitani S, Ruvkun G, Yates JR 3rd, Mello CC (2006) **Functional proteomics reveals the**  
1241 **biochemical niche of C. elegans DCR-1 in multiple small-RNA-mediated pathways**  
1242 *Cell* **124**:343–354.  
1243 <https://doi.org/10.1016/j.cell.2005.11.036>  
1244

- 1245 Eisen A, Uteley RT, Nourani A, Allard S, Schmidt P, Lane WS, Lucchesi JC, Cote J (2001) **The yeast**  
1246 **NuA4 and Drosophila MSL complexes contain homologous subunits important for**  
1247 **transcription regulation** *The Journal of biological chemistry* **276**:3484–3491.  
1248 <https://doi.org/10.1074/jbc.M008159200>  
1249
- 1250 Evans KJ, Huang N, Stempor P, Chesney MA, Down TA, Ahringer J (2016) **Stable *Caenorhabditis***  
1251 ***elegans* chromatin domains separate broadly expressed and developmentally regulated**  
1252 **genes** *Proceedings of the National Academy of Sciences of the United States of*  
1253 *America* **113**:E7020–E7029.  
1254 <https://doi.org/10.1073/pnas.1608162113>  
1255
- 1256 Fitz-James MH, Cavalli G (2022) **Molecular mechanisms of transgenerational**  
1257 **epigenetic inheritance** *Nature reviews Genetics* Advance online publication.  
1258 <https://doi.org/10.1038/s41576-021-00438-5>  
1259
- 1260 Fry CJ, Farnham PJ (1999) **Context-dependent transcriptional regulation** *The Journal of*  
1261 *biological chemistry* **274**:29583–29586.  
1262 <https://doi.org/10.1074/jbc.274.42.29583>  
1263
- 1264 Fujita M, Takasaki T, Nakajima N, Kawano T, Shimura Y, Sakamoto H (2002) **MRG-1, a mortality**  
1265 **factor-related chromodomain protein, is required maternally for primordial germ cells to**  
1266 **initiate mitotic proliferation in *C. elegans*** *Mechanisms of development* **114**:61–69.  
1267 [https://doi.org/10.1016/s0925-4773\(02\)00058-8](https://doi.org/10.1016/s0925-4773(02)00058-8)  
1268
- 1269 Furuhashi H, Takasaki T, Rechtsteiner A, Li T, Kimura H, Checchi PM, Strome S, Kelly WG (2010)  
1270 **Trans-generational epigenetic regulation of *C. elegans* primordial germ cells** *Epigenetics &*  
1271 *chromatin* **3**:15.  
1272 <https://doi.org/10.1186/1756-8935-3-15>  
1273
- 1274 Gallo CM, Wang JT, Motegi F, Seydoux G (2010) **Cytoplasmic partitioning of P granule**  
1275 **components is not required to specify the germline in *C. elegans*** *Science (New York,*  
1276 *N.Y.)* **330**:1685–1689.  
1277 <https://doi.org/10.1126/science.1193697>  
1278
- 1279 Gaydos LJ, Rechtsteiner A, Egelhofer TA, Carroll CR, Strome S (2012) **Antagonism between**  
1280 **MES-4 and Polycomb repressive complex 2 promotes appropriate gene expression in *C.***  
1281 ***elegans* germ cells** *Cell reports* **2**:1169–1177. <https://doi.org/10.1016/j.celrep.2012.09.019>  
1282
- 1283 Gaydos LJ, Wang W, Strome S (2014) **Gene repression. H3K27me and PRC2 transmit a memory**  
1284 **of repression across generations and during development** *Science (New York, N.Y.)* **345**:1515–  
1285 1518.  
1286 <https://doi.org/10.1126/science.1255023>  
1287

- 1288 Garvin C, Holdeman R, Strome S (1998) **The phenotype of mes-2, mes-3, mes-4 and mes-6,**  
1289 **maternal-effect genes required for survival of the germline in *Caenorhabditis elegans*, is**  
1290 **sensitive to chromosome dosage** *Genetics* **148**:167–185.  
1291 <https://doi.org/10.1093/genetics/148.1.167>  
1292
- 1293 Georgescu PR, Capella M, Fischer-Burkart S, Braun S (2020) **The euchromatic histone mark**  
1294 **H3K36me3 preserves heterochromatin through sequestration of an acetyltransferase**  
1295 **complex in fission yeast** *Microbial cell (Graz, Austria)* **7**:80–92.  
1296 <https://doi.org/10.15698/mic2020.03.711>  
1297
- 1298 Gerstein MB, Lu ZJ, Van Nostrand EL, Cheng C, Arshinoff BI, Liu T, Yip KY, Robilotto R,  
1299 Rechtsteiner A, Ikegami K, Alves P, Chateigner A, Perry M, Morris M, Auerbach RK, Feng X, Leng  
1300 J, Vielle A, Niu W, Rhrissorrakra K, et al. (2010) **Integrative analysis of the *Caenorhabditis***  
1301 ***elegans* genome by the modENCODE project** *Science (New York, N.Y.)* **330**:1775–1787.  
1302 <https://doi.org/10.1126/science.1196914>  
1303
- 1304 Gorman M, Franke A, Baker BS (1995) **Molecular characterization of the male-specific lethal-3**  
1305 **gene and investigations of the regulation of dosage compensation in *Drosophila*** *Development*  
1306 *(Cambridge, England)* **121**:463–475.  
1307
- 1308 Grant CE, Bailey TL, Noble WS (2011) **FIMO: scanning for occurrences of a given**  
1309 **motif** *Bioinformatics (Oxford, England)* **27**:1017–1018.  
1310 <https://doi.org/10.1093/bioinformatics/btr064>  
1311
- 1312 Gu W, Shirayama M, Conte D Jr, Vasale J, Batista PJ, Claycomb JM, Moresco JJ, Youngman EM,  
1313 Keys J, Stoltz MJ, Chen CC, Chaves DA, Duan S, Kasschau KD, Fahlgren N, Yates JR 3rd, Mitani S,  
1314 Carrington JC, Mello CC (2009) **Distinct argonaute-mediated 22G-RNA pathways direct**  
1315 **genome surveillance in the *C. elegans* germline** *Molecular cell* **36**:231–244.  
1316 <https://doi.org/10.1016/j.molcel.2009.09.020>  
1317
- 1318 Heard E, Martienssen RA (2014) **Transgenerational epigenetic inheritance: myths and**  
1319 **mechanisms** *Cell* **157**:95–109.  
1320 <https://doi.org/10.1016/j.cell.2014.02.045>  
1321
- 1322 Huang DW, Sherman BT, Lempicki RA (2009) **Systematic and integrative analysis of large gene**  
1323 **lists using DAVID bioinformatics resources** *Nature protocols* **4**:44–57.  
1324 <https://doi.org/10.1038/nprot.2008.211>  
1325
- 1326 Ji N, van Oudenaarden A (2012) **Single molecule fluorescent in situ hybridization (smFISH) of *C.***  
1327 ***elegans* worms and embryos** *WormBook: the online review of C. elegans biology* 1–16.  
1328 <https://doi.org/10.1895/wormbook.1.153.1>  
1329

- 1330 Joshi AA, Struhl K (2005) **Eaf3 chromodomain interaction with methylated H3-K36 links**  
1331 **histone deacetylation to Pol II elongation** *Molecular cell* **20**:971–978.  
1332 <https://doi.org/10.1016/j.molcel.2005.11.021>  
1333
- 1334 Kamath RS, Fraser AG, Dong Y, Poulin G, Durbin R, Gotta M, Kanapin A, Le Bot N, Moreno S,  
1335 Sohrmann M, Welchman DP, Zipperlen P, Ahringer J (2003) **Systematic functional analysis of**  
1336 **the *Caenorhabditis elegans* genome using RNAi** *Nature* **421**:231–237.  
1337 <https://doi.org/10.1038/nature01278>  
1338
- 1339 Kaneshiro KR, Rechtsteiner A, Strome S (2019) **Sperm-inherited H3K27me3 impacts offspring**  
1340 **transcription and development in *C. elegans*** *Nature communications* **10**:1271.  
1341 <https://doi.org/10.1038/s41467-019-09141-w>  
1342
- 1343 Kawasaki I, Shim YH, Kirchner J, Kaminker J, Wood WB, Strome S (1998) **PGL-1, a predicted**  
1344 **RNA-binding component of germ granules, is essential for fertility in *C. elegans*** *Cell* **94**:635–  
1345 645.  
1346 [https://doi.org/10.1016/s0092-8674\(00\)81605-0](https://doi.org/10.1016/s0092-8674(00)81605-0)  
1347
- 1348 Kelly WG, Schaner CE, Dernburg AF, Lee MH, Kim SK, Villeneuve AM, Reinke V (2002) **X-**  
1349 **chromosome silencing in the germline of *C. elegans*** *Development (Cambridge, England)*  
1350 **129**:479–492.  
1351
- 1352 Kemphues KJ, Priess JR, Morton DG, Cheng NS (1988) **Identification of genes required for**  
1353 **cytoplasmic localization in early *C. elegans* embryos** *Cell* **52**:311–320.  
1354 [https://doi.org/10.1016/s0092-8674\(88\)80024-2](https://doi.org/10.1016/s0092-8674(88)80024-2)  
1355
- 1356 Ketel CS, Andersen EF, Vargas ML, Suh J, Strome S, Simon JA (2005) **Subunit contributions to**  
1357 **histone methyltransferase activities of fly and worm polycomb group complexes** *Molecular*  
1358 *and cellular biology* **25**:6857–6868.  
1359 <https://doi.org/10.1128/MCB.25.16.6857-6868.2005>  
1360
- 1361 Kizer KO, Phatnani HP, Shibata Y, Hall H, Greenleaf AL, Strahl BD (2005) **A novel domain in Set2**  
1362 **mediates RNA polymerase II interaction and couples histone H3 K36 methylation with**  
1363 **transcript elongation** *Molecular and cellular biology* **25**:3305–3316.  
1364 <https://doi.org/10.1128/MCB.25.8.3305-3316.2005>  
1365
- 1366 Klosin A, Casas E, Hidalgo-Carcedo C, Vavouri T, Lehner B (2017) **Transgenerational**  
1367 **transmission of environmental information in *C. elegans*** *Science (New York, N.Y.)* **356**:320–323  
1368 <https://doi.org/10.1126/science.aah6412>  
1369
- 1370 Knutson AK, Egelhofer T, Rechtsteiner A, Strome S (2017) **Germ Granules Prevent**  
1371 **Accumulation of Somatic Transcripts in the Adult *Caenorhabditis elegans* Germline** *Genetics*  
1372 **206**:163–178.  
1373 <https://doi.org/10.1534/genetics.116.198549>

- 1374  
1375 Kreher J, Takasaki T, Cockrum C, Sidoli S, Garcia BA, Jensen ON, Strome S (2018) **Distinct Roles**  
1376 **of Two Histone Methyltransferases in Transmitting H3K36me3-Based Epigenetic Memory**  
1377 **Across Generations in *Caenorhabditis elegans*** *Genetics* **210**:969–982.  
1378 <https://doi.org/10.1534/genetics.118.301353>  
1379  
1380 Kudron MM, Victorsen A, Gevirtzman L, Hillier LW, Fisher WW, Vafeados D, Kirkey M,  
1381 Hammonds AS, Gersch J, Ammouri H, Wall ML, Moran J, Steffen D, Szykarek M, Seabrook-  
1382 Sturgis S, Jameel N, Kadaba M, Patton J, Terrell R, Corson M, et al. (2018) **The ModERN**  
1383 **Resource: Genome-Wide Binding Profiles for Hundreds of *Drosophila* and *Caenorhabditis***  
1384 ***elegans* Transcription Factors** *Genetics* **208**:937–949.  
1385 <https://doi.org/10.1534/genetics.117.300657>  
1386  
1387 Lawrence M, Huber W, Pagès H, Aboyoun P, Carlson M, Gentleman R, Morgan MT, Carey VJ  
1388 (2013) **Software for computing and annotating genomic ranges** *PLoS computational*  
1389 *biology* **9**:e1003118.  
1390 <https://doi.org/10.1371/journal.pcbi.1003118>  
1391  
1392 Lee CS, Lu T, Seydoux G (2017) **Nanos promotes epigenetic reprogramming of the germline by**  
1393 **down-regulation of the THAP transcription factor LIN-15B** *eLife* **6**:e30201.  
1394 <https://doi.org/10.7554/eLife.30201>  
1395  
1396 Liao Y, Smyth GK, Shi W (2014) **featureCounts: an efficient general purpose program for**  
1397 **assigning sequence reads to genomic features** *Bioinformatics* **30**:923-930.  
1398 <https://doi.org/10.1093/bioinformatics/btt656>  
1399  
1400 Love MI, Huber W, Anders S (2014) **Moderated estimation of fold change and dispersion for**  
1401 **RNA-seq data with DESeq2** *Genome Biology* **15**:550.  
1402 <https://doi.org/10.1186/s13059-014-0550-8>  
1403  
1404 Lun AT, Bach K, Marioni JC (2016) **Pooling across cells to normalize single-cell RNA sequencing**  
1405 **data with many zero counts.** *Genome Biology* **17**:75.  
1406 <https://doi.org/10.1186/s13059-016-0947-7>  
1407  
1408 Margueron R, Reinberg D (2011) **The Polycomb complex PRC2 and its mark in life**  
1409 *Nature* **469**:343–349.  
1410 <https://doi.org/10.1038/nature09784>  
1411  
1412 McCarthy DJ, Campbell KR, Lun AT, Wills QF (2017) **Scater: pre-processing, quality control,**  
1413 **normalization and visualization of single-cell RNA-seq data in R** *Bioinformatics* **33**:1179-1186.  
1414 <https://doi.org/10.1093/bioinformatics/btw777>  
1415  
1416 Maeda I, Kohara Y, Yamamoto M, Sugimoto A (2001) **Large-scale analysis of gene function in**  
1417 ***Caenorhabditis elegans* by high-throughput RNAi** *Current biology* **11**:171–176.

- 1418 [https://doi.org/10.1016/s0960-9822\(01\)00052-5](https://doi.org/10.1016/s0960-9822(01)00052-5)  
1419
- 1420 Nüsslein-Volhard C, Frohnhöfer HG, Lehmann R (1987) **Determination of anteroposterior**  
1421 **polarity in *Drosophila*** *Science (New York, N.Y.)* **238**:1675–1681.  
1422 <https://doi.org/10.1126/science.3686007>  
1423
- 1424 Ortiz MA, Noble D, Sorokin EP, Kimble J (2014) **A new dataset of spermatogenic vs. oogenic**  
1425 **transcriptomes in the nematode *Caenorhabditis elegans* G3 (Bethesda, Md.)** **4**:1765–1772.  
1426 <https://doi.org/10.1534/g3.114.012351>  
1427
- 1428 Patel T, Tursun B, Rahe DP, Hobert O (2012) **Removal of Polycomb repressive complex 2 makes**  
1429 ***C. elegans* germ cells susceptible to direct conversion into specific somatic cell types** *Cell*  
1430 *reports* **2**:1178–1186.  
1431 <https://doi.org/10.1016/j.celrep.2012.09.020>  
1432
- 1433 Pengelly AR, Copur Ö, Jäckle H, Herzig A, Müller J (2013) **A histone mutant reproduces the**  
1434 **phenotype caused by loss of histone-modifying factor Polycomb** *Science (New York,*  
1435 *N.Y.)* **339**:698–699  
1436 <https://doi.org/10.1126/science.1231382>  
1437
- 1438 Petrella LN, Wang W, Spike CA, Rechtsteiner A, Reinke V, Strome S (2011) **synMuv B proteins**  
1439 **antagonize germline fate in the intestine and ensure *C. elegans* survival** *Development*  
1440 *(Cambridge, England)* **138**:1069–1079.  
1441 <https://doi.org/10.1242/dev.059501>  
1442
- 1443 Picelli S, Faridani OR, Björklund AK, Winberg G, Sagasser S, Sandberg R (2014) **Full-length RNA-**  
1444 **seq from single cells using Smart-seq2** *Nature Protocols* **9**:171–181.  
1445 <https://doi.org/10.1038/nprot.2014.006>  
1446
- 1447 Raj A, van den Bogaard P, Rifkin SA, van Oudenaarden A, Tyagi S (2008) **Imaging individual**  
1448 **mRNA molecules using multiple singly labeled probes** *Nature methods* **5**:877–879.  
1449 <https://doi.org/10.1038/nmeth.1253>  
1450
- 1451 Ramírez F, Ryan DP, Grüning B, Bhardwaj V, Kilpert F, Richter AS, Heyne S, Dündar F, Manke T  
1452 (2016) **deepTools2: a next generation web server for deep-sequencing data analysis** *Nucleic*  
1453 *acids research* **44(W1)**:W160–W165.  
1454 <https://doi.org/10.1093/nar/gkw257>  
1455
- 1456 Rechtsteiner A, Ercan S, Takasaki T, Phippen TM, Egelhofer TA, Wang W, Kimura H, Lieb JD,  
1457 Strome S (2010) **The histone H3K36 methyltransferase MES-4 acts epigenetically to transmit**  
1458 **the memory of germline gene expression to progeny** *PLoS genetics* **6**:e1001091.  
1459 <https://doi.org/10.1371/journal.pgen.1001091>  
1460

- 1461 Rechtsteiner A, Costello ME, Egelhofer TA, Garrigues JM, Strome S, Petrella LN (2019)  
1462 **Repression of Germline Genes in *Caenorhabditis elegans* Somatic Tissues by H3K9**  
1463 **Dimethylation of Their Promoters** *Genetics* **212**:125–140.  
1464 <https://doi.org/10.1534/genetics.118.301878>  
1465  
1466 Reinke V, Gil IS, Ward S, Kazmer K (2004) **Genome-wide germline-enriched and sex-biased**  
1467 **expression profiles in *Caenorhabditis elegans*** *Development (Cambridge, England)* **131**:311–  
1468 323.  
1469 <https://doi.org/10.1242/dev.00914>  
1470  
1471 Robert VJ, Knutson AK, Rechtsteiner A, Garvis S, Yvert G, Strome S, Palladino F  
1472 (2020) ***Caenorhabditis elegans* SET1/COMPASS Maintains Germline Identity by Preventing**  
1473 **Transcriptional Dereglulation Across Generations** *Frontiers in cell and developmental*  
1474 *biology* **8**:561791.  
1475 <https://doi.org/10.3389/fcell.2020.561791>  
1476  
1477 Rongo C, Lehmann R (1996) **Regulated synthesis, transport and assembly of the *Drosophila***  
1478 **germ plasm** *Trends in genetics: TIG* **12**:102–109.  
1479 [https://doi.org/10.1016/0168-9525\(96\)81421-1](https://doi.org/10.1016/0168-9525(96)81421-1)  
1480  
1481 Schmitges FW, Prusty AB, Faty M, Stützer A, Lingaraju GM, Aiwazian J, Sack R, Hess D, Li L, Zhou  
1482 S, Bunker RD, Wirth U, Bouwmeester T, Bauer A, Ly-Hartig N, Zhao K, Chan H, Gu J, Gut H,  
1483 Fischle W, et al. (2011) **Histone methylation by PRC2 is inhibited by active chromatin marks**  
1484 *Molecular cell* **42**:330–341.  
1485 <https://doi.org/10.1016/j.molcel.2011.03.025>  
1486  
1487 Seelk S, Adrian-Kalchhauser I, Hargitai B, Hajduskova M, Gutnik S, Tursun B, Ciosk R (2016)  
1488 **Increasing Notch signaling antagonizes PRC2-mediated silencing to promote reprogramming of**  
1489 **germ cells into neurons** *eLife* **5**:e15477.  
1490 <https://doi.org/10.7554/eLife.15477>  
1491  
1492 Strome S, Kelly WG, Ercan S, Lieb JD (2014) **Regulation of the X chromosomes in**  
1493 ***Caenorhabditis elegans*** *Cold Spring Harbor perspectives in biology* **6**:a018366.  
1494 <https://doi.org/10.1101/cshperspect.a018366>  
1495  
1496 Stephens M (2017) **False discovery rates: a new deal** *Biostatistics (Oxford, England)* **18**:275–  
1497 294.  
1498 <https://doi.org/10.1093/biostatistics/kxw041>  
1499  
1500 Strome S, Updike D (2015) **Specifying and protecting germ cell fate** *Nature reviews. Molecular*  
1501 *cell biology* **16**:406–416.  
1502 <https://doi.org/10.1038/nrm4009>  
1503



- 1504 Tabuchi TM, Rechtsteiner A, Jeffers TE, Egelhofer TA, Murphy CT, Strome S (2018)  
1505 **Caenorhabditis elegans sperm carry a histone-based epigenetic memory of both**  
1506 **spermatogenesis and oogenesis** *Nature communications* **9**:4310.  
1507 <https://doi.org/10.1038/s41467-018-06236-8>  
1508
- 1509 Takasaki T, Liu Z, Habara Y, Nishiwaki K, Nakayama J, Inoue K, Sakamoto H, Strome S (2007)  
1510 **MRG-1, an autosome-associated protein, silences X-linked genes and protects germline**  
1511 **immortality in Caenorhabditis elegans** *Development (Cambridge, England)* **134**:757–767.  
1512 <https://doi.org/10.1242/dev.02771>  
1513
- 1514 Tong ZB, Gold L, Pfeifer KE, Dorward H, Lee E, Bondy CA, Dean J, Nelson LM (2000) **Mater, a**  
1515 **maternal effect gene required for early embryonic development in mice** *Nature*  
1516 *genetics* **26**:267–268.  
1517 <https://doi.org/10.1038/81547>  
1518
- 1519 Tzur YB, Winter E, Gao J, Hashimshony T, Yanai I, Colaiácovo, MP (2018) **Spatiotemporal Gene**  
1520 **Expression Analysis of the Caenorhabditis elegans Germline Uncovers a Syncytial Expression**  
1521 **Switch** *Genetics* **210**:587–605.  
1522 <https://doi.org/10.1534/genetics.118.301315>  
1523
- 1524 Updike DL, Knutson AK, Egelhofer TA, Campbell AC, Strome S (2014) **Germ-granule components**  
1525 **prevent somatic development in the C. elegans germline** *Current biology* **24**:970–975.  
1526 <https://doi.org/10.1016/j.cub.2014.03.015>  
1527
- 1528 Unhavaithaya Y, Shin TH, Miliaras N, Lee J, Oyama T, Mello CC (2002) **MEP-1 and a homolog of**  
1529 **the NURD complex component Mi-2 act together to maintain germline-soma distinctions in C.**  
1530 **elegans** *Cell* **111**:991–1002.  
1531 [https://doi.org/10.1016/s0092-8674\(02\)01202-3](https://doi.org/10.1016/s0092-8674(02)01202-3)  
1532
- 1533 Wang D, Kennedy S, Conte D Jr, Kim JK, Gabel HW, Kamath RS, Mello CC, Ruvkun G (2005)  
1534 **Somatic misexpression of germline P granules and enhanced RNA interference in**  
1535 **retinoblastoma pathway mutants** *Nature* **436**:593–597.  
1536 <https://doi.org/10.1038/nature04010>  
1537
- 1538 Wang X, Zhao Y, Wong K, Ehlers P, Kohara Y, Jones SJ, Marra MA, Holt RA, Moerman DG,  
1539 Hansen D (2009) **Identification of genes expressed in the hermaphrodite germ line of C.**  
1540 **elegans using SAGE** *BMC genomics* **10**:213.  
1541 <https://doi.org/10.1186/1471-2164-10-213>  
1542
- 1543 Wedeles CJ, Wu MZ, Claycomb JM (2013) **Protection of germline gene expression by the C.**  
1544 **elegans Argonaute CSR-1** *Developmental cell* **27**:664–671.  
1545 <https://doi.org/10.1016/j.devcel.2013.11.016>  
1546

- 1547 Weirauch MT, Yang A, Albu M, Cote AG, Montenegro-Montero A, Drewe P, Najafabadi HS,  
1548 Lambert SA, Mann I, Cook K, Zheng H, Goity A, van Bakel H, Lozano JC, Galli M, Lewsey MG,  
1549 Huang E, Mukherjee T, Chen X, Reece-Hoyes JS, et al. (2014) **Determination and inference of**  
1550 **eukaryotic transcription factor sequence specificity** *Cell* **158**:1431–1443.  
1551 <https://doi.org/10.1016/j.cell.2014.08.009>  
1552
- 1553 Wu X, Shi Z, Cui M, Han M, Ruvkun, G (2012) **Repression of germline RNAi pathways in somatic**  
1554 **cells by retinoblastoma pathway chromatin complexes** *PLoS genetics* **8**:e1002542.  
1555 <https://doi.org/10.1371/journal.pgen.1002542>  
1556
- 1557 Xu L, Fong Y, Strome S (2001) **The Caenorhabditis elegans maternal-effect sterile proteins,**  
1558 **MES-2, MES-3, and MES-6, are associated in a complex in embryos** *Proceedings of the National*  
1559 *Academy of Sciences of the United States of America* **98**:5061–5066.  
1560 <https://doi.org/10.1073/pnas.081016198>  
1561
- 1562 Yochum GS, Ayer DE (2002) **Role for the mortality factors MORF4, MRGX, and MRG15 in**  
1563 **transcriptional repression via associations with Pf1, mSin3A, and Transducin-Like Enhancer of**  
1564 **Split** *Molecular and cellular biology* **22**:7868–7876.  
1565 <https://doi.org/10.1128/MCB.22.22.7868-7876.2002>  
1566
- 1567 Yu G, Wang LG, He QY (2015) **ChIPseeker: an R/Bioconductor package for ChIP peak**  
1568 **annotation, comparison and visualization** *Bioinformatics (Oxford, England)* **31**:2382–2383.  
1569 <https://doi.org/10.1093/bioinformatics/btv145>  
1570
- 1571 Yuan W, Xu M, Huang C, Liu N, Chen S, Zhu B (2011) **H3K36 methylation antagonizes PRC2-**  
1572 **mediated H3K27 methylation** *The Journal of biological chemistry* **286**:7983–7989.  
1573 <https://doi.org/10.1074/jbc.M110.194027>  
1574
- 1575 Zerbino DR, Johnson N, Juettemann T, Wilder SP, Flicek P (2014) **WiggleTools: parallel**  
1576 **processing of large collections of genome-wide datasets for visualization and statistical**  
1577 **analysis** *Bioinformatics (Oxford, England)* **30**:1008–1009.  
1578 <https://doi.org/10.1093/bioinformatics/btt737>  
1579  
1580  
1581  
1582  
1583  
1584  
1585  
1586  
1587  
1588  
1589  
1590

1591 SUPPLEMENT

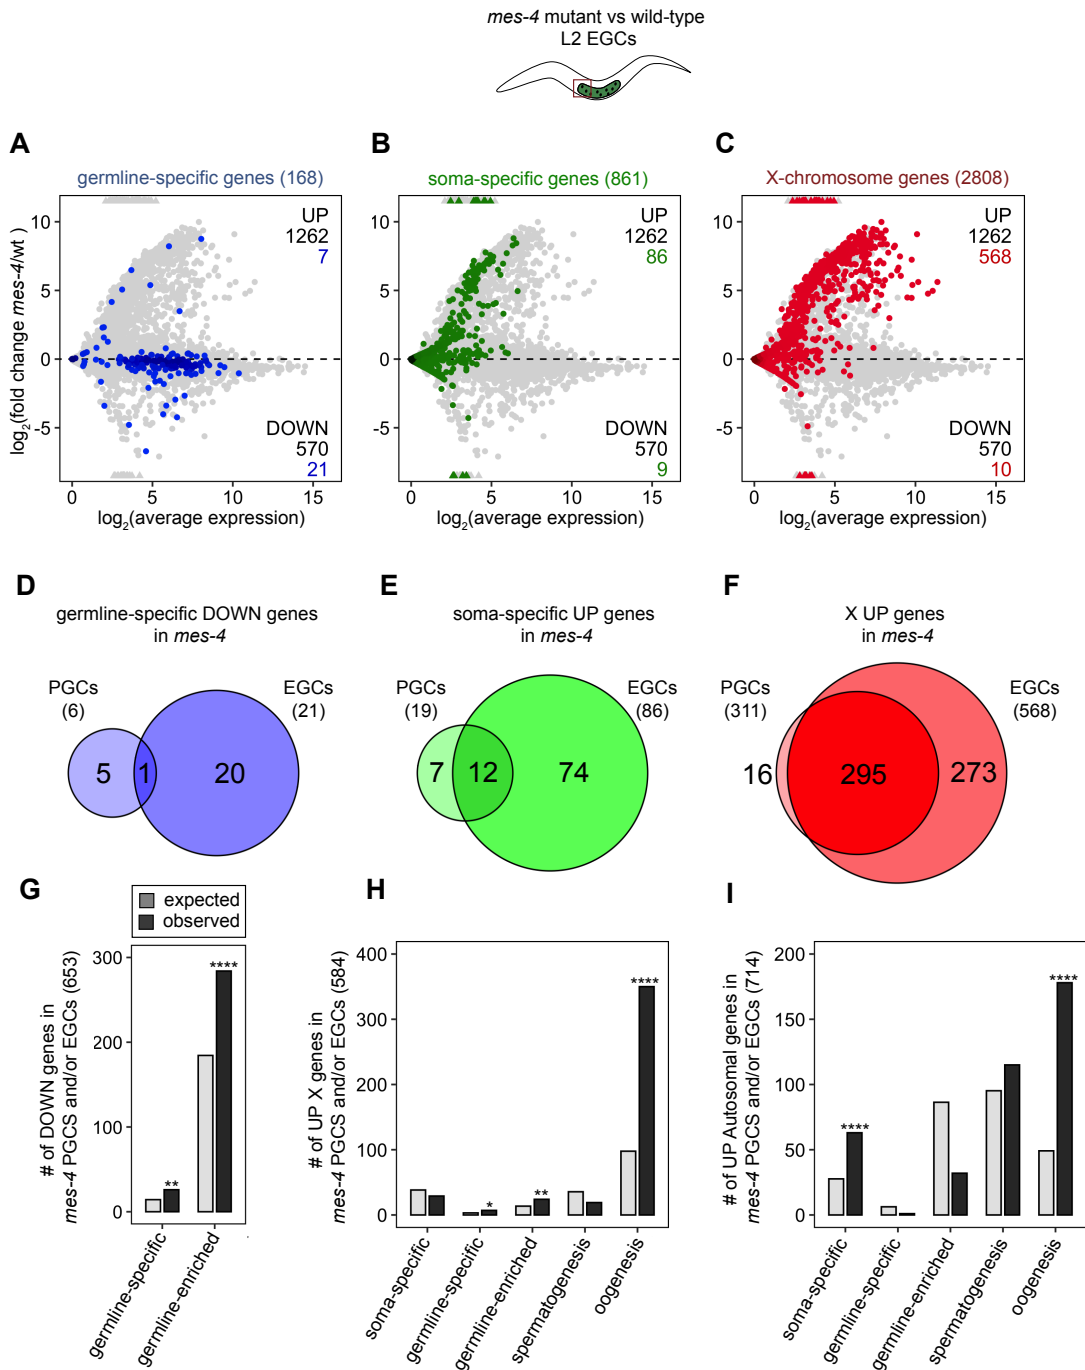

1592

1593

1594 **Figure 1—figure supplement 1: *mes-4* M-Z- EGCs have more severe transcriptome defects**

1595 **than *mes-4* M-Z- PGCs. (A,B,C)** MA plots as described in Figure 1B-D showing differential

1596 expression analysis for *mes-4* vs wt Early Germ Cells (EGCs). (D,E,F) Venn diagrams comparing

1597 sets of mis-regulated genes (*mes-4* vs wt) between PGCs and EGCs: (D) DOWN germline-specific

1598 genes, (E) UP soma-specific genes, and (F) UP X genes. (G,H,I) Bar plots showing the expected

1599 number (light gray) and observed number (dark gray) of mis-regulated genes in either *mes-4*  
1600 PGCs and/or EGCs that are members of the indicated gene sets. Hypergeometric tests were  
1601 performed in R to test for gene-set enrichment. P-value designations are \* < 0.01, \*\* < 0.001,  
1602 and \*\*\*\* < 1e-5. (G) Enrichment analyses for DOWN genes were restricted to 6,682 protein-  
1603 coding genes that we defined as 'expressed' (minimum average read count of 1) in either wt  
1604 PGCs or EGCs. Gene set sizes germline-specific (146), germline-enriched (1887). (H,I)  
1605 Enrichment analyses for UP genes included all 20,258 protein-coding genes in the  
1606 transcriptome. Gene set sizes (on the X and autosomes):: soma-specific (184, 677), germline-  
1607 specific (15, 153), germline-enriched (65, 2111), spermatogenesis (171, 2327), oogenesis (470,  
1608 1201).

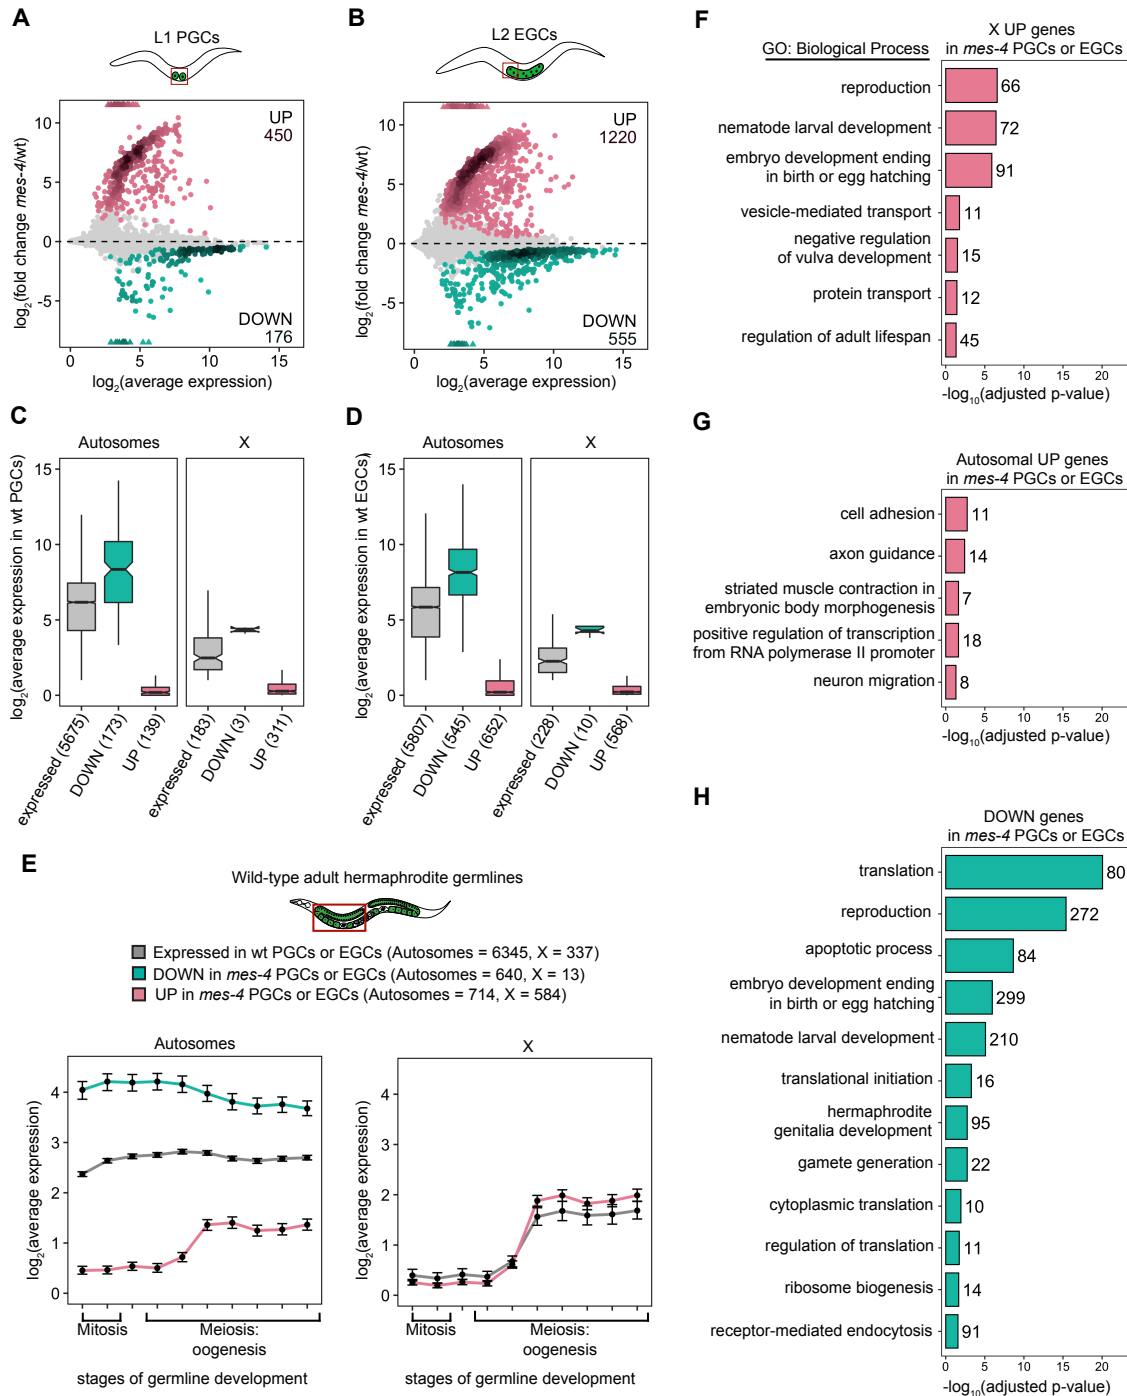

1609 **Figure 1—figure supplement 2: Analysis of features of mis-regulated genes in *mes-4* M-Z**  
 1610 **PGCs and EGCs.** (A,B) MA plots as described in Figure 1B-D showing differential expression  
 1611 analysis for (A) *mes-4* vs wt PGCs and (B) *mes-4* vs wt EGCs. Colored circles represent mis-  
 1612 regulated genes ( $q$ -value < 0.05); UP genes are in pink and DOWN genes are in teal. (C,D)  
 1613 Boxplots showing distributions of transcript abundance for autosomal (left) or X-linked (right)  
 1614 expressed genes (gray), DOWN genes (teal), UP genes (pink) in (C) wt PGCs and (D) wt EGCs.  
 1615 Boxplots show the median, the 25<sup>th</sup> and 50<sup>th</sup> percentiles (boxes), and the 2.5<sup>th</sup> and 97.5<sup>th</sup>  
 1616 percentiles (whiskers). (E) Line plots showing log<sub>2</sub>(average expression) across 10 regions of a

1617 wild-type adult hermaphrodite gonad that capture different stages of germline development  
1618 (data from Tzur et al., 2018, Tables S2A and S10A). Average expression values were calculated  
1619 in Tzur et al. by normalizing each gene's read counts to the total number of read counts in a  
1620 sample, multiplying those normalized values by  $10^5$ , and finally averaging across 2 independent  
1621 samples. Each dot represents the mean expression of a gene set (colors) in 1 of the 10 germline  
1622 regions. Whiskers correspond to 95% confidence intervals of the mean. Gene set sizes are  
1623 indicated. The set of DOWN X genes was not analyzed due to its small size (13 genes). (F,G,H)  
1624 Bar plots showing significantly enriched (Benjamini Hochberg-adjusted p-value < 0.05) gene  
1625 ontology (GO) biological process terms in sets of mis-regulated genes (*mes-4* PGCs and/or  
1626 EGCs): (F) X UP genes, (G) autosomal UP genes, and (H) DOWN genes. Numbers of mis-  
1627 regulated genes for each GO term are indicated. Analyses of UP genes (F and G) used all 20,258  
1628 protein coding genes as a background, while analysis of DOWN genes (H) used our set of 6,345  
1629 protein-coding genes expressed in wt PGCs or EGCs as a background. All GO analyses were  
1630 performed using DAVID Bioinformatics Resource 6.8 (Huang et al., 2009).

1631  
1632  
1633  
1634  
1635  
1636  
1637  
1638  
1639  
1640  
1641  
1642  
1643  
1644  
1645  
1646  
1647  
1648  
1649  
1650  
1651  
1652  
1653  
1654  
1655  
1656  
1657  
1658  
1659

| transcript     | gene category     | smFISH in L1 PGCs      |                              | RNA-seq in L1 PGCs     |                               |
|----------------|-------------------|------------------------|------------------------------|------------------------|-------------------------------|
|                |                   | $\log_2$ (fold change) | p-value<br>Mann Whitney test | $\log_2$ (fold change) | adjusted p-value<br>Wald test |
| <i>cpg-2</i>   | germline-specific | -2.72                  | 1.19e-6                      | -3.97                  | 1.43e-4                       |
| <i>pgl-3</i>   | germline-specific | -0.199                 | 0.328                        | -0.213                 | 0.634                         |
| <i>chs-1</i>   | germline-enriched | -0.150                 | 0.277                        | -0.131                 | 0.758                         |
| <i>lsd-1</i>   | X-linked          | 4.80                   | 4.57e-5                      | 8.06                   | 1.26e-16                      |
| <i>mbk-1</i>   | X-linked          | 2.75                   | 1.96e-6                      | 9.23                   | 3.26e-31                      |
| <i>pek-1</i>   | X-linked          | 2.32                   | 3.27e-6                      | 8.55                   | 3.47e-26                      |
| <i>lin-15B</i> | X-linked          | 1.68                   | 4.16e-6                      | 1.22                   | 0.1                           |

1660 **Figure 2—figure supplement 1: Comparison of smFISH and transcript profiling data.** Table  
1661 showing differential expression statistics for the 7 genes tested by smFISH.  $\log_2$ (fold change)  
1662 values were calculated by comparing mean transcript counts in *mes-4* PGCs to wt PGCs, and the  
1663 p-value is from a Mann Whitney test. For transcript profiling analysis, ‘shrunkened’  $\log_2$ (fold  
1664 change) values were calculated using DESeq2 and ashR in R (Stephens, 2017).  
1665  
1666  
1667  
1668  
1669  
1670  
1671  
1672  
1673  
1674  
1675  
1676  
1677  
1678  
1679  
1680  
1681  
1682  
1683  
1684  
1685  
1686  
1687  
1688  
1689  
1690

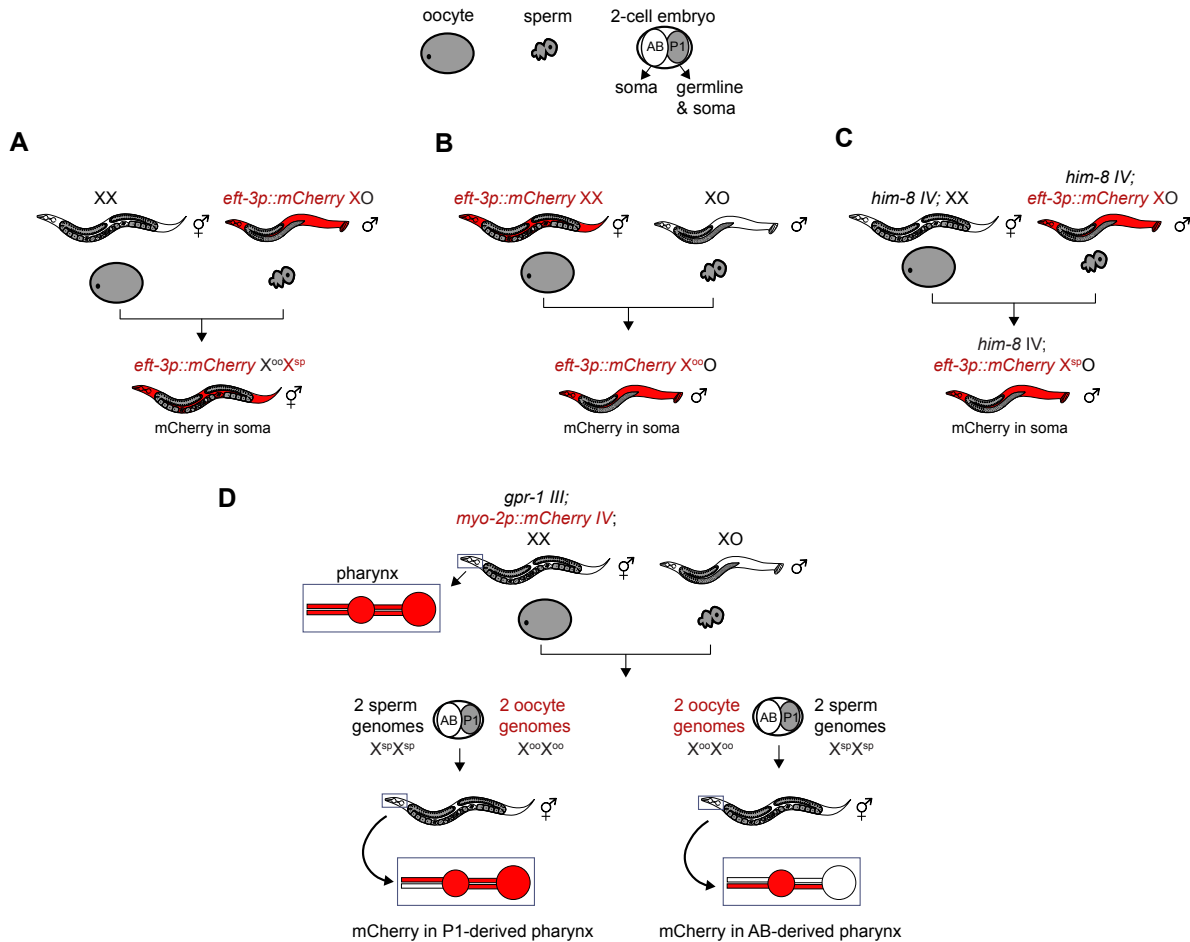

1691  
 1692 **Figure 3—figure supplement 1: Genetic strategies to generate and identify F1 offspring that**  
 1693 **inherited different X-chromosome endowments from parents.** (A-C) X-linked and soma-  
 1694 expressed mCherry driven by the *eft-3* promoter was used to track X-chromosome inheritance  
 1695 patterns in F1 offspring. (C) To generate males that inherited their single X from the sperm, we  
 1696 used the *him-8(e1489)* allele to cause X-chromosome nondisjunction in the maternal germline,  
 1697 which causes some oocytes to lack an X. (D) To generate hermaphrodites whose germline  
 1698 inherited either 2 genomes from the oocyte or 2 genomes from the sperm, we used a *gpr-1*  
 1699 over-expression allele. Expression of mCherry driven by the *myo-2* promoter in AB-derived  
 1700 pharyngeal muscle or P1-derived pharyngeal muscle was used to identify F1 hermaphrodite  
 1701 offspring with non-Mendelian inheritance patterns.

1702  
 1703  
 1704  
 1705  
 1706  
 1707  
 1708  
 1709



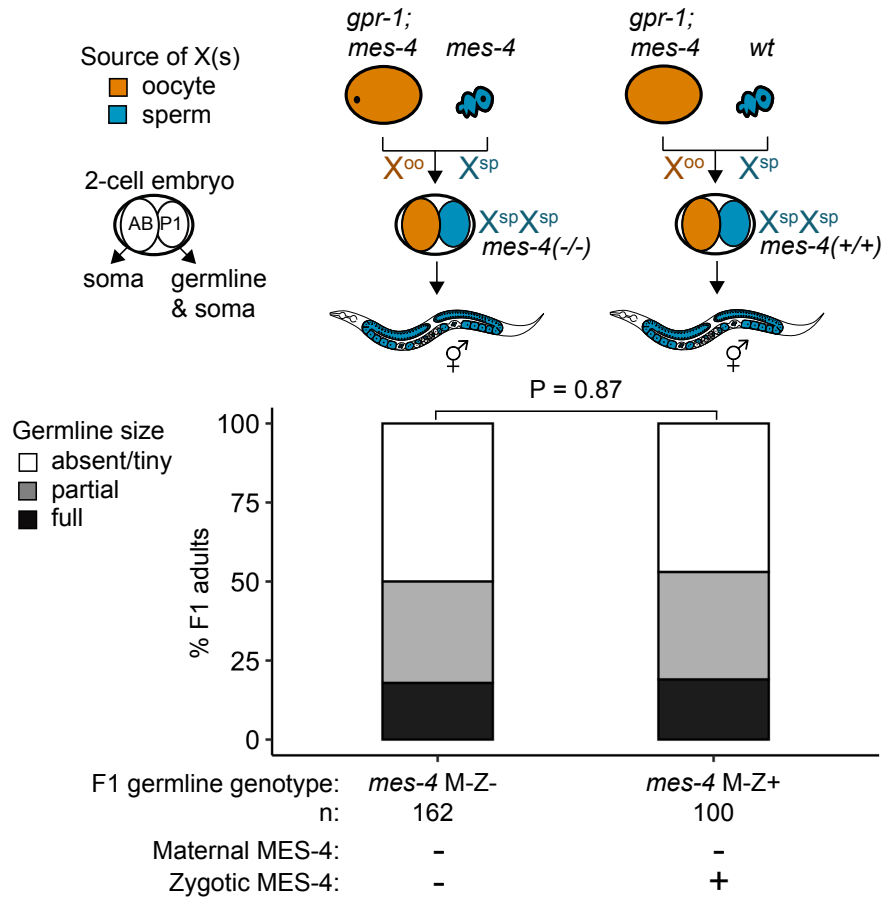

1710  
 1711  
 1712  
 1713  
 1714  
 1715  
 1716  
 1717  
 1718  
 1719  
 1720  
 1721  
 1722  
 1723  
 1724  
 1725  
 1726  
 1727  
 1728  
 1729

**Figure 3—figure supplement 2: *mes-4 M-Z+*  $X^{sp}/X^{sp}$  mutants do not have healthier germlines than *mes-4 M-Z-*  $X^{sp}/X^{sp}$  mutants.** Bar plots as described in Figure 3 showing distributions of germline size (absent/tiny, partial, and full) in F1 offspring whose germline inherited 2 X chromosomes from the sperm. Numbers of scored F1 offspring, the genotype of their germlines, and the presence or absence of maternal MES-4 or zygotic MES-4 are indicated below the bars. Notably, the germlines of *mes-4 M-Z+* offspring have 2 wild-type copies of *mes-4* that they inherited from the sperm.

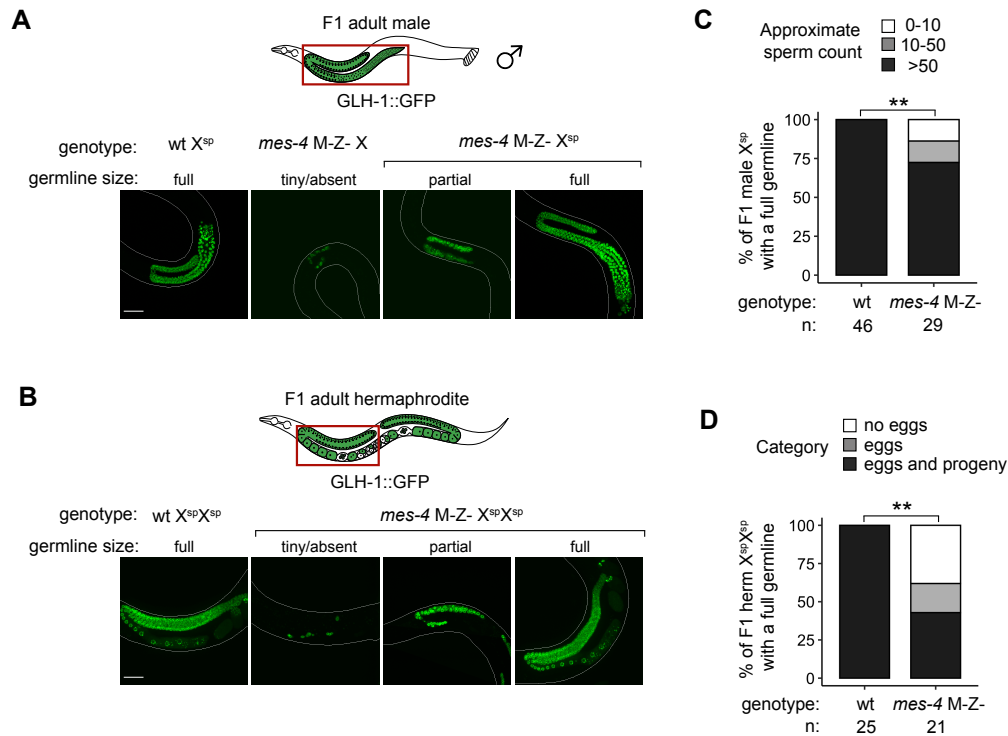

1730  
1731  
1732  
1733  
1734  
1735  
1736  
1737  
1738  
1739  
1740  
1741  
1742  
1743  
1744  
1745  
1746  
1747  
1748  
1749  
1750  
1751  
1752  
1753

**Figure 3—figure supplement 3: Further fertility analyses of *mes-4* M-Z- mutants that inherited their X(s) from the sperm.** (A,B) Representative images of live F1 offspring with a germline scored as either tiny/absent, partial, or full. Genotypes of imaged worms with respect to the *mes-4* locus and their germline's X-chromosome composition are indicated. Green signal is the germline marker GLH-1::GFP. Worm bodies are outlined in white. Scale bar is 45  $\mu$ M. (A) F1 male offspring generated using the *him-8(e1489)* allele. All imaged males inherited their single X from the sperm, except the male with a tiny/absent germline; that male inherited its X either from the mother's oocyte or mother's sperm (self-fertilization). (B) F1 hermaphrodite offspring generated using the *gpr-1* allele form a germline composed of 2 genomes from the sperm. (C) Bar plots showing sperm counts in F1 male offspring that were classified as having a full germline. Percentages of F1 males that had >50 sperm were compared between wt and *mes-4* mutant populations using a 2-sided Fisher's exact test. P-value designation is \*\* < 0.001. (D) Bar plots showing the presence or absence of eggs and viable progeny in F1 hermaphrodite offspring that were classified as having full germlines. Percentages of F1 hermaphrodites that had eggs and viable progeny were compared between wt and *mes-4* mutant populations using a 2-sided Fisher's exact test.



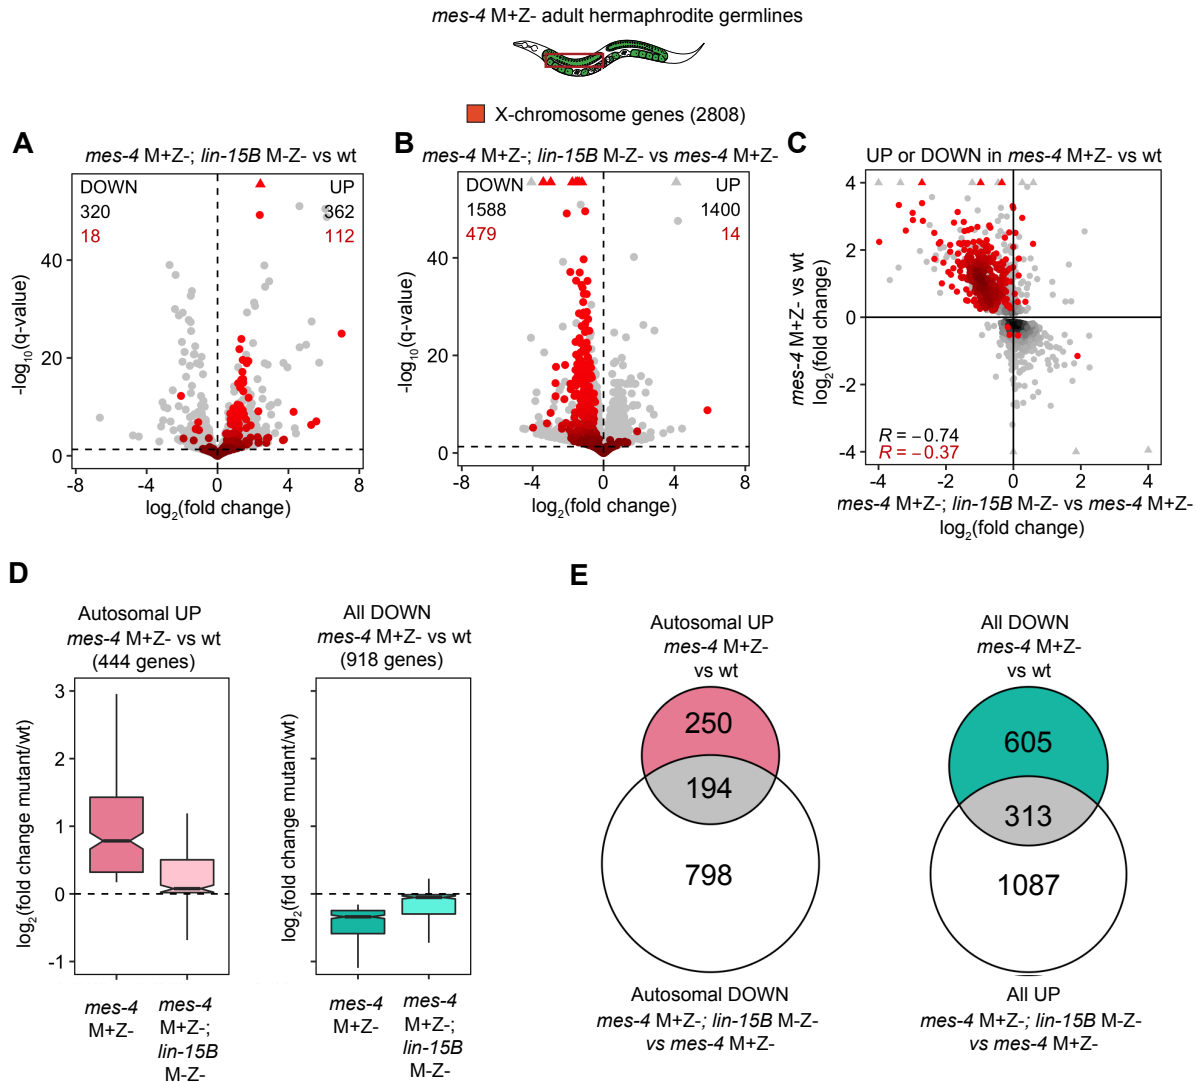

1774 **Figure 4—figure supplement 2: Further analysis of how LIN-15B impacts the transcriptome of**  
 1775 ***mes-4* M+Z- dissected adult germlines.** (A,B) Volcano plots as described in Figure 4A showing  
 1776 differential expression analysis for (A) *mes-4* M+Z-; *lin-15B* M-Z- vs wt adult germlines and for  
 1777 (B) *mes-4* M+Z-; *lin-15B* M-Z- vs *mes-4* M+Z- germlines. X genes are colored red. (C) Scatterplot  
 1778 comparing  $\log_2(\text{fold change})$  in *mes-4* M+Z- vs wt adult germlines to  $\log_2(\text{fold change})$  in *mes-4*  
 1779 M+Z-; *lin-15B* M-Z- vs *mes-4* M+Z- adult germlines. Only genes that were either UP or DOWN (q-  
 1780 value < 0.05) in *mes-4* M+Z- vs wt adult germlines are shown. X genes are colored red. The  
 1781 Spearman's correlation coefficient is indicated for all plotted genes (black) and for plotted X  
 1782 genes (red). (D) Boxplots as described in Figure 4B for autosomal UP genes in *mes-4* M+Z- vs wt  
 1783 (left) and for DOWN genes in *mes-4* M+Z- vs wt (right). (E) Venn diagrams as described in Figure  
 1784 4C for the indicated gene sets.

1785  
1786  
1787  
1788

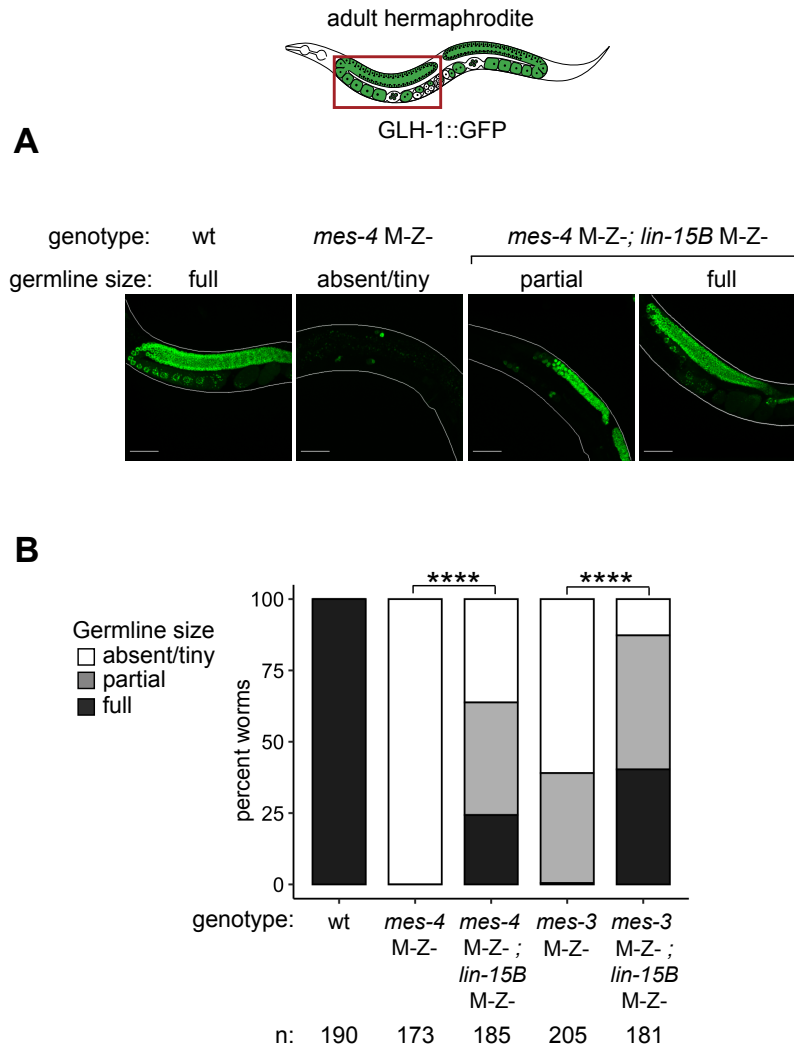

1789  
1790  
1791  
1792  
1793  
1794  
1795  
1796  
1797  
1798  
1799  
1800  
1801  
1802  
1803  
1804  
1805

**Figure 4—figure supplement 3: Removal of LIN-15B improves germline health in *mes-4* M-Z-  $X^{oo}/X^{sp}$  mutant hermaphrodites.** (A) Representative images of live F1 adult hermaphrodite offspring with a germline scored as either absent/tiny, partial, or full. Genotypes of imaged worms with respect to *mes-4* and *lin-15B* are indicated. All F1s inherited 1 X from the oocyte and 1 X from the sperm. Green signal is the germline marker GLH-1::GFP. Worm bodies are outlined in white. Scale bar is 45  $\mu$ M. (B) Bar plots as described in Figure 4D showing distributions of germline size in F1 offspring. Genotypes and sample sizes are indicated. Percentages of F1s with full-sized germlines were compared using 2-sided Fisher's exact tests. P-value designation is \*\*\*\*  $< 1e-5$ .

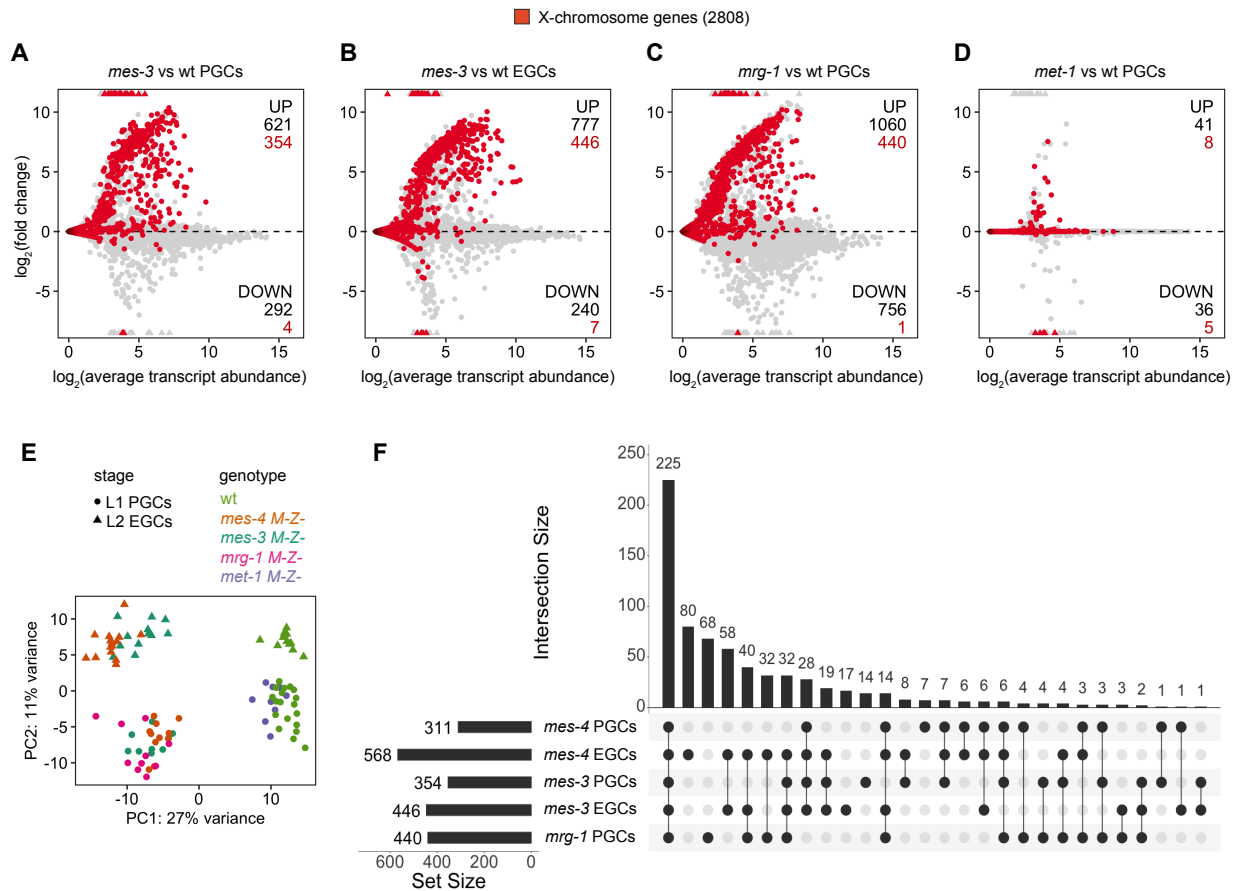

1806  
 1807  
 1808  
 1809  
 1810  
 1811  
 1812  
 1813  
 1814  
 1815  
 1816  
 1817

**Figure 5—figure supplement 1: Comparison of X mis-expression in PGCs and EGCs dissected from various chromatin regulator mutants.** (A-D) MA plots as described in Figure 1B-D showing differential expression analysis for (A) *mes-3* M-Z- vs wt PGCs, (B) *mes-3* M-Z- vs wt EGCs, (C) *mrg-1* M-Z- vs wt PGCs, and (D) *met-1* M-Z- vs wt PGCs. X genes are colored red. (E) PCA plot showing all analyzed transcript profiles across the first 2 principal components. Variance-stabilized counts computed by the *vst* function in DESeq2 were used to perform PCA. Stages and genotypes of worms are indicated by shape and color, respectively. (F) Upset plot generated using the UpsetR R package comparing sets of X UP (mutant vs wt) genes across *mes-4* PGCs, *mes-4* EGCs, *mes-3* PGCs, *mes-3* EGCs, and *mrg-1* PGCs.
